# Supplementary material for: Identifying older adults at increased risk of medication-related readmission to hospital within 30 days of discharge: development and validation of a risk assessment tool
Source: PubMed Central journal article supplement — BMJ Open. 2023 Aug 3;13(8):e070559. doi: 10.1136/bmjopen-2022-070559 (PMC10401249; doi:10.1136/bmjopen-2022-070559), 2023-08-03
Supplement: bmjopen-2022-070559.draft_revisions.pdf [file bmjopen-2022-070559.draft_revisions.pdf]

# BMJ Open

BMJ Open is committed to open peer review. As part of this commitment we make the peer review history of every article we publish publicly available.

When an article is published we post the peer reviewers' comments and the authors' responses online. We also post the versions of the paper that were used during peer review. These are the versions that the peer review comments apply to.

The versions of the paper that follow are the versions that were submitted during the peer review process. They are not the versions of record or the final published versions. They should not be cited or distributed as the published version of this manuscript.

BMJ Open is an open access journal and the full, final, typeset and author-corrected version of record of the manuscript is available on our site with no access controls, subscription charges or pay-per-view fees (<http://bmjopen.bmj.com>).

If you have any questions on BMJ Open's open peer review process please email [info.bmjopen@bmj.com](mailto:info.bmjopen@bmj.com)

# BMJ Open

## Identifying older adults at increased risk of medication-related readmission to hospital within 30 days of discharge - development and validation of a risk assessment tool

|                               |                                                                                                                                                                                                                                                                                                                                                                                                                                                                                                                                                                                                                                                                                                                                                                                                                                               |
|-------------------------------|-----------------------------------------------------------------------------------------------------------------------------------------------------------------------------------------------------------------------------------------------------------------------------------------------------------------------------------------------------------------------------------------------------------------------------------------------------------------------------------------------------------------------------------------------------------------------------------------------------------------------------------------------------------------------------------------------------------------------------------------------------------------------------------------------------------------------------------------------|
| Journal:                      | <i>BMJ Open</i>                                                                                                                                                                                                                                                                                                                                                                                                                                                                                                                                                                                                                                                                                                                                                                                                                               |
| Manuscript ID                 | bmjopen-2022-070559                                                                                                                                                                                                                                                                                                                                                                                                                                                                                                                                                                                                                                                                                                                                                                                                                           |
| Article Type:                 | Original research                                                                                                                                                                                                                                                                                                                                                                                                                                                                                                                                                                                                                                                                                                                                                                                                                             |
| Date Submitted by the Author: | 26-Nov-2022                                                                                                                                                                                                                                                                                                                                                                                                                                                                                                                                                                                                                                                                                                                                                                                                                                   |
| Complete List of Authors:     | Glans, Maria; Lund University, Center for Primary Health Care Research, Department of Clinical Sciences, Malmö; Region Skåne, Kristianstad-Hässleholm Hospitals, Department of Medications<br>Kempen, Thomas; Uppsala University, Department of Pharmacy; Uppsala County Council, Primary Care and Health<br>Jakobsson, Ulf; Lund University, Center for Primary Health Care Research, Department of Clinical Sciences, Malmö<br>Kragh Ekstam, Annika; Region Skåne, Kristianstad-Hässleholm Hospitals, Department of Orthopaedics<br>Bondesson, Åsa; Region Skåne, Department of Medicines Management and Informatics; Lund University, Center for Primary Health Care Research, Department of Clinical Sciences, Malmö<br>Midlöv, Patrik ; Lund University, Center for Primary Health Care Research, Department of Clinical Sciences, Malmö |
| Keywords:                     | Risk management < HEALTH SERVICES ADMINISTRATION & MANAGEMENT, GERIATRIC MEDICINE, Health & safety < HEALTH SERVICES ADMINISTRATION & MANAGEMENT, Quality in health care < HEALTH SERVICES ADMINISTRATION & MANAGEMENT                                                                                                                                                                                                                                                                                                                                                                                                                                                                                                                                                                                                                        |
|                               |                                                                                                                                                                                                                                                                                                                                                                                                                                                                                                                                                                                                                                                                                                                                                                                                                                               |

SCHOLARONE™  
Manuscripts

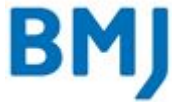

I, the Submitting Author has the right to grant and does grant on behalf of all authors of the Work (as defined in the below author licence), an exclusive licence and/or a non-exclusive licence for contributions from authors who are: i) UK Crown employees; ii) where BMJ has agreed a CC-BY licence shall apply, and/or iii) in accordance with the terms applicable for US Federal Government officers or employees acting as part of their official duties; on a worldwide, perpetual, irrevocable, royalty-free basis to BMJ Publishing Group Ltd ("BMJ") its licensees and where the relevant Journal is co-owned by BMJ to the co-owners of the Journal, to publish the Work in this journal and any other BMJ products and to exploit all rights, as set out in our [licence](#).

The Submitting Author accepts and understands that any supply made under these terms is made by BMJ to the Submitting Author unless you are acting as an employee on behalf of your employer or a postgraduate student of an affiliated institution which is paying any applicable article publishing charge ("APC") for Open Access articles. Where the Submitting Author wishes to make the Work available on an Open Access basis (and intends to pay the relevant APC), the terms of reuse of such Open Access shall be governed by a Creative Commons licence – details of these licences and which [Creative Commons](#) licence will apply to this Work are set out in our licence referred to above.

Other than as permitted in any relevant BMJ Author's Self Archiving Policies, I confirm this Work has not been accepted for publication elsewhere, is not being considered for publication elsewhere and does not duplicate material already published. I confirm all authors consent to publication of this Work and authorise the granting of this licence.

1  
2  
3  
4 1 **Identifying older adults at increased risk of medication-related readmission to**  
5  
6  
7  
8 2 **hospital within 30 days of discharge - development and validation of a risk**  
9  
10  
11  
12 3 **assessment tool**  
13  
14

15 4 *Maria Glans<sup>\*,1,2</sup>, Thomas Gerardus Hendrik Kempen<sup>3,4</sup>, Ulf Jakobsson<sup>1</sup>, Annika Kragh Ekstam<sup>5</sup>, Åsa*  
16  
17 *Bondesson<sup>1,6</sup>, Patrik Midlöv<sup>1</sup>*  
18

19  
20 6 <sup>1</sup> Center for Primary Health Care Research, Department of Clinical Sciences Malmö, Lund University,  
21  
22 Malmö, Sweden  
23

24  
25 8 <sup>2</sup> Department of Medications, Kristianstad-Hässleholm Hospitals, Region Skåne, Kristianstad, Sweden  
26

27  
28 9 <sup>3</sup> Department of Pharmacy, Uppsala University, Uppsala, Sweden  
29

30  
31 10 <sup>4</sup> Primary Care and Health, Uppsala County Council, Uppsala, Sweden  
32

33  
34 11 <sup>5</sup> Department of Orthopaedics, Kristianstad-Hässleholm Hospitals, Region Skåne, Kristianstad,  
35  
36 Sweden  
37

38  
39 13 <sup>6</sup> Department of Medicines Management and Informatics in Skåne County, Region Skåne,  
40  
41 Kristianstad, Sweden  
42

43  
44  
45  
46  
47 16 \* Corresponding author:  
48

49  
50 17 Maria Glans  
51

52  
53 18 E-mail: maria.glans@med.lu.se  
54

55  
56 19 Postal address: Center for Primary Health Care Research, Department of Clinical Sciences, Malmö  
57

58  
59 20 Lund University, Clinical Research Center, Box 50332, 20213 Malmö, Sweden  
60

1  
2  
3 21  
4  
56 22 **Word count:** 4330 words  
7  
89  
10 23 **KEYWORDS**  
1112 24 Older adults; Transitions in care; Patient discharge; Medication-related patient readmission; Risk  
13  
14 25 factors; Risk assessment  
15  
1617  
18 26  
19  
2021 27 **ABSTRACT**  
2223  
24  
25 28 **Objective**  
2627  
28 29 To develop and validate a risk assessment tool aiming to identify older adults ( $\geq 65$  years) at  
29  
30 30 increased risk of possibly medication-related readmission to hospital within 30 days of discharge.  
31  
3233  
34 31 **Methods**  
3536  
37 32 The development cohort (n=720) was admitted to a hospital in the south of Sweden during 2017  
38  
39 33 whereas the validation cohort (n=892) was admitted to a hospital in the mid-eastern part of Sweden  
40  
41 34 during 2017-2018. Variables known at first admission and individually associated with possibly  
42  
43 35 medication-related readmission were used when developing the risk assessment tool. The included  
44  
45 36 variables were assigned points and Youden's index was used to decide a threshold score. The risk  
46  
47 37 score was calculated for all individuals in both cohorts. ROC-curves were plotted, and c-indexes were  
48  
49 38 calculated as well as Hosmer and Lemeshow goodness-of-fit, Nagelkerke  $R^2$ , sensitivity, specificity,  
50  
51 39 and positive and negative predictive values.  
52  
53  
54  
55  
56  
57  
58  
59  
60

## 40 Results

41 The developed 0-6 point risk assessment tool, the HOME Score, had a c-index of 0.69 in the  
42 development cohort and 0.65 in the validation cohort. Calibration was good in both cohorts. The risk  
43 score showed sensitivity 76%, specificity 54%, positive predictive value 29%, and negative predictive  
44 value 90% at the threshold score in the development cohort.

## 45 Conclusion

46 The HOME Score can be used to identify older adults at increased risk of possibly medication-related  
47 readmission within 30 days of discharge. The tool is easy to use and includes variables that are  
48 available in electronic health records at admission, thus making it possible to implement risk-  
49 reducing activities during the hospital stay as well as at discharge and in transitions of care. These  
50 activities could likely help increase patient safety and be beneficial to the health economy.

## 52 STRENGTHS AND LIMITATIONS OF THIS STUDY

- 53 • The HOME Score is the first externally validated risk assessment tool aiming to identify older  
54 adults at increased risk of medication-related readmission to hospital within 30 days of  
55 discharge.
- 56 • According to previous studies, preventive measures aiming to reduce medication-related  
57 readmission should preferably include interdisciplinary actions during the hospital stay and at  
58 discharge as well as in transitions of care and follow-up. Therefore, only variables available in the  
59 electronic health records at admission are included in the HOME Score.
- 60 • Further validations of the HOME Score are needed in order to establish its clinical usefulness in  
61 different departments as well as in other countries.

## 63 INTRODUCTION

64 Readmission to hospital is common, especially in older adults where almost 20% of discharges result  
65 in a readmission within 30 days (1-3). In older adults, hospitalisation can be associated with a risk of  
66 complications such as exposure to infections, rise in adverse events, episodes of confusion, and  
67 accidental injury through falls (4, 5). As readmissions are not only a risk for the individual patient but  
68 also for the health economy (3), many countries have set goals to decrease the frequency of  
69 readmission within 30 days of discharge (3, 6, 7).

70 A relatively large proportion of readmissions of older adults are medication-related (8-10). Many of  
71 these medication-related readmissions may be possible to prevent, even though the proportion  
72 deemed preventable differs between studies (8). Preventive measures should aim to improve  
73 medication use as well as transitions of care (11, 12) and are best performed by combining several  
74 minor activities into concepts (12, 13). These activities should preferably include interdisciplinary  
75 actions during the hospital stay and at discharge (12) as well as collaboration between hospital,  
76 primary, and municipal care in transitions of care (14).

77 To effectively implement interventions, healthcare personnel need to be able to identify patients at  
78 increased risk of medication-related readmission. This could preferably be done by using a risk  
79 assessment tool or risk score (15). Some risk assessment tools linked to medication-related  
80 readmission have been developed (16, 17). The PRIME tool, developed by Parekh et al (16),  
81 identifies older adults at increased risk of medication-related harm requiring healthcare use within  
82 eight weeks of discharge while the decision support tool developed by Olson et al (17) predicts the  
83 risk of readmission in older adults using high-risk medication regimens. None of these tools have  
84 been validated in an external population or tested in a setting other than the one where it was  
85 developed.

86 To our knowledge, there is no risk assessment tool available that specifically aims to identify older  
87 adults at increased risk of possibly medication-related readmission to hospital within 30 days of

1  
2  
3 88 discharge. If such a tool was available, interventions aiming to prevent readmission could be  
4  
5 89 implemented based on the risk in the individual patient (15). This could make it possible to not only  
6  
7 90 increase patient safety but also relocate some resources to other areas within healthcare (18).  
8  
9

10  
11 91

## 12 13 14 92 **OBJECTIVE**

15  
16  
17 93 The aim of this study was to develop and validate a risk assessment tool that can be used to identify  
18  
19 94 older adults ( $\geq 65$  years) at increased risk of possibly medication-related readmission to hospital  
20  
21 95 within 30 days of discharge.  
22  
23  
24  
25 96

## 26 27 28 97 **METHODS**

29  
30  
31 98 This study is reported according to the transparent reporting of a multivariable prediction model for  
32  
33 99 individual prognosis or diagnosis (TRIPOD) statement (15).  
34  
35

### 36 37 100 **Setting**

38  
39  
40 101 Sweden is divided into 21 regions and 290 municipalities (19). Primary and hospital care is provided  
41  
42 102 by the regions while nursing care, in the community or in nursing homes, is provided by the local  
43  
44 103 municipalities. When it comes to planning patient care after hospital discharge, hospital and  
45  
46 104 municipal care are expected to collaborate (20).  
47  
48

49  
50 105 According to Swedish regulations (21), medication reconciliation should be performed by the  
51  
52 106 attending physician when patients aged 75 years and older using five medications or more are  
53  
54 107 admitted to hospital. If medication-related problems are present, the medication reconciliation  
55  
56 108 should be followed by a medication review which could or could not be performed interdisciplinary  
57  
58 109 (i.e. involving a geriatrician or a clinical pharmacist). Unfortunately, adherence to these regulations  
59  
60



1  
2  
3 110 seems generally low (22) with only about 15% of patients aged 75 years and older receiving a  
4  
5 111 medication reconciliation and/or medication review during their hospital stay (22).  
6  
7

## 8 112 **Patient and public involvement**

9  
10  
11  
12 113 Patients or the public were not involved in this study.  
13

## 14 114 **Development of the risk assessment tool**

15  
16  
17  
18 115 The risk assessment tool was developed using anonymised data and results from our previously  
19  
20 116 published retrospective studies (10, 23) where further details on the methods of data collection can  
21  
22 117 be found.  
23  
24

## 25 118 **Study sample and procedure**

26  
27  
28  
29 119 The study was conducted at Kristianstad hospital, which is an emergency hospital with 255 beds  
30  
31 120 situated in Skåne county in the south of Sweden. The study population, which is further referred to  
32  
33 121 as the development cohort, consisted of randomly selected patients (n=720), aged 65 years and  
34  
35 122 older, who had been admitted to Kristianstad hospital for at least 24 hours in 2017. Patients were  
36  
37 123 admitted to one of the following departments: internal medicine, infectious disease, general  
38  
39 124 surgery, orthopaedics, or ear/nose/throat. The study group (n=360) was readmitted within 30 days  
40  
41 125 of discharge while the comparison group (n=360) was not. Variables were collected from electronic  
42  
43 126 health records in an unblinded yet standardised and objective manner, as previously described (23).  
44  
45  
46  
47 127 In total 143 of 360 readmissions (39.7%) were assessed as being possibly medication-related (10).  
48  
49 128 Assessments were made using the Assessment Tool for identifying Hospital Admissions Related to  
50  
51 129 Medication (AT-HARM10), a validated tool to distinguish between admissions that are possibly and  
52  
53 130 unlikely medication-related (24). With AT-HARM10 a possibly medication-related  
54  
55  
56 131 (re-)admission is defined as being either caused by or significantly contributed to by a medication-  
57  
58 132 related problem (for further details see Appendix 1). Preliminary assessments, made by the first  
59  
60

1  
2  
3 133 author in an unblinded fashion, were reviewed, revised, and finalised by an experienced geriatrician.

4  
5 134 For further details on the assessment process see our previous publication (10).

6  
7  
8 135 Through multiple logistic regression analysis (stepwise backward) individual risk factors associated  
9  
10 136 with all-cause readmission, possibly medication-related readmission, and unlikely medication-  
11  
12 137 related readmission within 30 days of discharge were identified, as described in our previous  
13  
14  
15 138 publications (10, 23).

### 16 17 18 139 Variables included

19  
20  
21 140 The risk assessment tool was developed using variables identified by comparing patients with a  
22  
23 141 possibly medication-related readmission (n=143) with those that did not have a possibly medication-  
24  
25 142 related readmission (n=577) (i.e. patients with an unlikely medication-related readmission (n=217)  
26  
27 143 and patients not readmitted (n=360)). Only variables known at first admission to hospital were  
28  
29 144 included in the development of the risk assessment tool.

30  
31  
32  
33 145 Variables shown to be associated with possibly medication-related readmission, through multiple  
34  
35 146 logistic regression analysis, were chosen to be included in the final risk assessment tool. For  
36  
37 147 continuous variables, categorical variables were created based on comparisons between groups.

### 38 39 40 41 148 Data analysis

42  
43  
44 149 Based on the odds ratios of the individual variables in the final multiple logistic regression model,  
45  
46 150 suitable weighting and scoring were decided upon for each of the included variables. A risk score,  
47  
48 151 which summarised the points assigned to each of the variables included, was calculated for all the  
49  
50 152 included individuals. Finally, a new logistic regression analysis was performed with possibly  
51  
52 153 medication-related readmission as the dependent variable and the risk score as the test variable,  
53  
54 154 saving the probabilities for further analysis. To estimate the quality of the model Hosmer and  
55  
56 155 Lemeshow goodness-of-fit was calculated as well as Nagelkerke R<sup>2</sup>.

1  
2  
3 156 A ROC-curve was plotted using the saved probabilities and the area under the ROC-curve (c-index)  
4  
5 157 was calculated giving a measure of how well the tool predicts possibly medication-related  
6  
7 158 readmission.

9  
10 159 To decide upon a suitable threshold value in the risk assessment tool Youdens' index ( $J = \text{Sensitivity} +$   
11  
12 160  $\text{Specificity} - 1$ ) was calculated for all steps in the risk score. Cross-tabulation was used to calculate  
13  
14 161 sensitivity, specificity, and positive and negative predictive values as well as to identify the number  
15  
16 162 of correctly predicted patients.

17  
18  
19  
20 163 Statistical analyses were performed using IBM SPSS Statistics version 27.  
21  
22

### 23 164 External validation of the risk score

24  
25  
26 165 To check the predictive ability of the risk score, as well as its precision and usefulness in other  
27  
28 166 populations, we performed an external validation using data from the Medication Reviews Bridging  
29  
30 167 Healthcare (MedBridge) trial (25).  
31  
32  
33

### 34 168 Study sample and procedure

35  
36  
37 169 The MedBridge trial (25, 26) was a randomised clinical trial conducted at four hospitals (Uppsala,  
38  
39 170 Gävle, Västerås, and Enköping) in the mid-eastern part of Sweden. The aim of the trial was to study  
40  
41 171 the effects of hospital-based medication reviews including post-discharge follow-up on the use of  
42  
43 172 healthcare resources in older adults ( $\geq 65$  years), compared with hospital-based reviews and usual  
44  
45 173 care only.

46  
47  
48  
49 174 Included participants were admitted to a medical ward at one of the four included hospitals for at  
50  
51 175 least 24 hours within the time-frame 6<sup>th</sup> of February 2017 to the 19<sup>th</sup> of October 2018. Out of the  
52  
53 176 2637 patients included in the trial, 1745 were included in one of the two medication review groups,  
54  
55 177 and 892 patients were included in the usual care group. Outcomes measured in the trial included  
56  
57  
58  
59  
60

1  
2  
3 178 readmission to hospital within 30 days of discharge and possibly medication-related readmission as  
4  
5 179 assessed with AT-HARM10 (24).  
6  
7

8 180 To make sure the medication review interventions in the MedBridge trial could not affect the result  
9  
10 181 of the validation, the MedBridge control group, i.e. the 892 patients receiving usual care, was chosen  
11  
12 182 to create the validation cohort in which the developed risk assessment tool was validated. In the  
13  
14 183 validation cohort (n=892) 132 patients were readmitted within 30 days of discharge and 54 of these  
15  
16 184 readmissions (40.9%) were assessed as being possibly medication-related.  
17  
18  
19

## 20 185 Data analysis

21  
22  
23 186 A multiple logistic regression analysis with the variables included in the risk assessment tool was  
24  
25 187 performed in the validation cohort, comparing patients with a possibly medication-related  
26  
27 188 readmission (n=54) and those that did not have a possibly medication-related readmission (n=838)  
28  
29 189 (i.e. those with an unlikely medication-related readmission (n=78) and those that were not  
30  
31 190 readmitted within 30 days of discharge (n=760)). To estimate the quality of the model, Hosmer and  
32  
33 191 Lemeshow goodness-of-fit was calculated as well as Nagelkerke R<sup>2</sup>.  
34  
35  
36  
37

38 192 The risk score was calculated for each of the individuals in the validation cohort and a new logistic  
39  
40 193 regression analysis was performed with possibly medication-related readmission as the dependent  
41  
42 194 variable and the risk score as the test variable. Probabilities were saved and used to plot a ROC-  
43  
44 195 curve where the c-index was calculated giving an estimate of the predictive ability of the risk  
45  
46 196 assessment tool in this external population.  
47  
48

49 197 Cross-tabulation was used at each of the steps in the risk score to calculate sensitivity, specificity,  
50  
51 198 and positive and negative predictive values. Furthermore, the number of correctly predicted patients  
52  
53 199 was identified.  
54  
55

56  
57 200 Statistical analysis was performed using IBM SPSS Statistics version 27.  
58  
59  
60

## 202 RESULTS

### 203 Development of the risk assessment tool

#### 204 Variables included

205 The following variables were shown to be individually associated with possibly medication-related  
 206 readmission and chosen to be included in the risk assessment tool: *Number of hospitalisations within*  
 207 *the last 12 months, Living in own home with home care, Living in own home alone, Number of*  
 208 *medications at admission, and Emergency admission.*

209 For the continuous variables, *Number of hospitalisations within the last 12 months* and *Number of*  
 210 *medications at admission*, categorical variables were created based on comparisons of means  
 211 between groups. The categorical variables were set as *Hospitalisations within the last 12 months  $\geq 2$*   
 212 and *Number of medications at admission  $\geq 5$* . A new multiple logistic regression analysis was  
 213 performed including these categorical variables creating the final model (Table 1).

215 **Table 1. Final multiple logistic regression model from the model development dataset with**  
 216 **possibly medication-related readmission within 30 days of discharge as the outcome variable<sup>a</sup>**

| Variable                                        | OR   | 95%CI for OR | p-value      |
|-------------------------------------------------|------|--------------|--------------|
| Age                                             | 1.00 | 0.98-1.03    | 0.927        |
| Sex                                             | 1.01 | 0.68-1.49    | 0.969        |
| Emergency admission                             | 3.98 | 1.40-11.33   | <b>0.010</b> |
| Hospitalisations in the last 12 months $\geq 2$ | 1.54 | 1.04-2.28    | <b>0.032</b> |
| Medications at admission $\geq 5$               | 2.20 | 1.27-3.80    | <b>0.005</b> |
| Living in own home with home care               | 1.85 | 1.18-2.91    | <b>0.008</b> |

|                          |      |           |              |
|--------------------------|------|-----------|--------------|
| Living in own home alone | 1.57 | 1.04-2.37 | <b>0.030</b> |
|--------------------------|------|-----------|--------------|

217 *Abbreviations: OR – Odds Ratio, CI – Confidence Interval*

218 *<sup>a</sup>Adjusted for gender and age.*

219 *Hosmer Lemeshow goodness of fit test p-value: 0.369. Nagelkerke R<sup>2</sup>: 0.113.*

220 *Significant p-values are indicated in bold.*

221

## 222 Developing the risk score

223 The odds ratios of the variables that were individually associated with possibly medication-related  
 224 readmission were used for assigning points to each of the included variables. Hence, since the odds  
 225 ratio for *Emergency admission* was about double the size of the other included variables, *Emergency*  
 226 *admission* was assigned two points whereas the other variables were assigned one point each, giving  
 227 a maximum score of six points. The resultant 0 to 6 point risk score, shown in Figure 1, was named  
 228 the Hospitalisations, Own home, Medications, and Emergency admission (HOME) Score.

229 The model showed good calibration with a Hosmer and Lemeshow goodness of fit p-value of 1.000  
 230 and Nagelkerke R<sup>2</sup> of 0.118. The calculated area under the risk score ROC-curve (c-index) was 0.69  
 231 (95%CI 0.64-0.74).

232

233 FIGURE 1 – the HOME Score

234

235 Youden's index was calculated for each step in the risk score using the coordinates in the ROC-curve  
 236 (Table 2). A suitable threshold value would be where Youden's Index is closest to 1, in this case at a  
 237 score of 4 or 5.

238

239 **Table 2. Youden's Index calculated for each step in the risk score in order to find a suitable**240 **threshold value**

| Score | Sensitivity | 1-Specificity | Specificity | Youden's Index |
|-------|-------------|---------------|-------------|----------------|
| 0     | 1.000       | 1.000         | 0.000       | 0.000          |
| 1     | 1.000       | 0.974         | 0.026       | 0.026          |
| 2     | 0.951       | 0.826         | 0.174       | 0.125          |
| 3     | 0.937       | 0.795         | 0.205       | 0.142          |
| 4     | 0.755       | 0.466         | 0.534       | 0.289          |
| 5     | 0.413       | 0.169         | 0.831       | 0.244          |
| 6     | 0.147       | 0.056         | 0.944       | 0.091          |

241

242 A threshold score of  $\geq 4$  points was finally chosen as the threshold score. The choice was based on  
 243 the desire to identify as many patients at increased risk of possibly medication-related readmission  
 244 as possible, i.e. sensitivity rather than specificity should be as high as possible. At the threshold score  
 245 ( $\geq 4$  points) sensitivity was 76%, specificity 54%, positive predictive value 29%, and negative  
 246 predictive value 90% (Table 3). The number of correctly predicted patients was 108 (out of 143).

247

248 **Table 3. Diagnostic testing of the HOME Score in the development and validation cohorts**

|             | Development<br>cohort | Validation<br>cohort |
|-------------|-----------------------|----------------------|
| Sample size | 720                   | 892                  |

|                                             |             |             |
|---------------------------------------------|-------------|-------------|
| Readmission within 30 days of discharge (%) | 360 (50)    | 132 (15)    |
| Possibly medication-related readmission (%) | 143 (40)    | 54 (41)     |
| Unlikely medication-related readmission (%) | 217 (60)    | 78 (59)     |
| Area under ROC-curve (standard error)       | 0.69 (0.02) | 0.65 (0.04) |
| 95% confidence interval                     | 0.64-0.74   | 0.57-0.72   |
| At HOME Score $\geq$ 4:                     |             |             |
| Sensitivity, %                              | 76          | 63          |
| Specificity, %                              | 54          | 51          |
| Positive predictive value, %                | 29          | 8           |
| Negative predictive value, %                | 90          | 96          |
| Number of correctly predicted patients      | 108         | 34          |
| At HOME Score $\geq$ 5                      |             |             |
| Sensitivity, %                              | 41          | 43          |
| Specificity, %                              | 83          | 80          |
| Positive predictive value, %                | 38          | 12          |
| Negative predictive value, %                | 85          | 96          |
| Number of correctly predicted patients      | 59          | 23          |

249

250

## 251 External validation of the risk assessment tool

252 In the validation cohort only the variable *Hospitalisations within the last 12 months  $\geq$ 2* was shown to  
 253 be individually associated with possibly medication-related readmission (Table 4).

254 Logistic regression analysis in the validation cohort, with *Possibly medication-related readmission* as  
 255 the dependent variable and *HOME score* as the test variable, showed good calibration with a  
 256 Hosmer and Lemeshow goodness of fit p-value of 1.000 and Nagelkerke R<sup>2</sup> of 0.051.



257

258 **Table 4. Comparison<sup>a</sup> of variables between groups in the development and validation cohort**

| Predictor                                              | Development cohort |                                             |                  | Validation cohort |                                             |              |
|--------------------------------------------------------|--------------------|---------------------------------------------|------------------|-------------------|---------------------------------------------|--------------|
|                                                        | PMRR<br>(n=143)    | Comparison<br>group <sup>b</sup><br>(n=577) | p-value          | PMRR<br>(n=54)    | Comparison<br>group <sup>b</sup><br>(n=838) | p-value      |
| Hospitalisations within the last 12 months $\geq$ 2, % | 52                 | 36                                          | <b>&lt;0.001</b> | 30                | 17                                          | <b>0.018</b> |
| Living in own home, with home care, %                  | 37                 | 18                                          | <b>&lt;0.001</b> | 35                | 24                                          | 0.058        |
| Living in own home, alone, %                           | 53                 | 37                                          | <b>&lt;0.001</b> | 54                | 45                                          | 0.213        |
| Number of medications at admission $\geq$ 5, %         | 87                 | 71                                          | <b>&lt;0.001</b> | 91                | 81                                          | 0.077        |
| Emergency admission, %                                 | 97                 | 89                                          | <b>0.002</b>     | 100               | 96                                          | 0.150        |

259 *Abbreviations: PMRR – Possibly Medication-Related Readmission*

260 <sup>a</sup>A  $\chi^2$ -test was used for analysis in all cases, <sup>b</sup>Comparison group = Patients not readmitted and  
 261 patients with an unlikely medication-related readmission

262 *Significant p-values (p<0.05) are indicated in bold.*

263

264 The c-index of the HOME Score was 0.65 (CI95% 0.57-0.72, p-value &lt; 0.001) in the validation cohort.

265 The risk score, with the cut-off point set at  $\geq$ 4 points, showed a nonsignificant difference between  
 266 groups (p-value 0.051). At this threshold score ( $\geq$ 4) sensitivity was 63%, specificity 51%, positive

267 predictive value 8%, and negative predictive value 96% (Table 3). The number of correctly predicted

1  
2  
3 268 patients was 34 (out of 54). With the cut-off point set at  $\geq 5$  points there was a significant difference  
4  
5 269 between groups (p value  $< 0.001$ ). Sensitivity was 43%, specificity 80%, positive predictive value 12%  
6  
7 270 and negative predictive value 96%. The number of correctly predicted patients was 23 (out of 54)  
8  
9  
10 271 (Table 3).  
11  
12

272

## 273 DISCUSSION

274 The risk assessment tool developed in this study, the HOME Score, is the first externally validated  
275 risk assessment tool that can be used to identify older adults ( $\geq 65$  years) at increased risk of possibly  
276 medication-related readmission to hospital within 30 days of discharge. The HOME Score was  
277 discriminative of possibly medication-related readmission and showed good calibration in  
278 development as well as in external validation. It is easy to use and includes variables that are readily  
279 available in the electronic health records at admission, thus making it possible to implement risk-  
280 reducing activities during the hospital stay as well as at discharge and in the transition of care.

### 281 Comparisons to other studies

282 There have not yet, to our knowledge, been any risk assessment tools developed that are directly  
283 comparable to the HOME Score. However, there are several tools that can be used to identify  
284 patients at increased risk of all-cause readmission to hospital within 30 days of discharge, such as the  
285 HOSPITAL Score (27) and the LACE Index (28). There are also a few risk assessment tools related to  
286 medication-related healthcare use after discharge, such as the PRIME tool (16) and the decision  
287 support tool developed by Olson et al (17). However, none of the above-mentioned tools solely  
288 includes factors that are known already at admission as does the HOME Score.

289 The PRIME tool, developed by Parekh et al (16), identifies older patients ( $\geq 65$  years) at increased risk  
290 of medication-related harm requiring healthcare use within eight weeks of discharge from hospital.

1  
2  
3 291 The tool was derived in a multicentre, prospective cohort study in the UK. In total 818 patients  
4  
5 292 discharged from five UK teaching hospitals between 2013 and 2015 were included. The PRIME tool  
6  
7 293 was internally validated using bootstrapping and the c-index was 0.69 before and 0.66 after  
8  
9 294 validation. Hence, compared to the PRIME tool, the HOME Score has a similar predictive ability with  
10  
11 295 a c-index of 0.69 in the development cohort and 0.65 in the validation cohort.  
12  
13  
14

### 15 296 **Variables included in the model**

16  
17  
18 297 The variables included in the HOME Score were identified in our previous studies (10, 23) where we  
19  
20 298 identified risk factors of all-cause readmission, possibly medication-related readmission, and unlikely  
21  
22 299 medication-related readmission within 30 days of discharge, in patients 65 years and older. We  
23  
24 300 chose to solely include variables known already at admission since research suggests that the  
25  
26 301 successful reduction of possibly medication-related readmission demands the implementation of  
27  
28 302 actions during the hospital stay (29) as well as at discharge (12) and in transitions of care (14). In  
29  
30 303 order to do this, patients at increased risk of possibly medication-related readmission need to be  
31  
32 304 identified already at admission. Hence, the HOME Score has an advantage compared to previously  
33  
34 305 developed tools such as the PRIME tool (16), which include factors not known until discharge.  
35  
36  
37  
38  
39

### 40 306 **Hospitalisations within the last 12 months $\geq 2$**

41  
42  
43 307 The number of previous hospitalisations is a measure of disease burden and the fact that readmitted  
44  
45 308 patients are more ill does not really come as a surprise since this has been shown previously (2, 23,  
46  
47 309 28). In a Swedish study from 2022, Naseer et al (30) showed that emergency department visits in  
48  
49 310 older adults are significantly associated with several variables indicating disease burden, such as  
50  
51 311 number of chronic diseases, number of primary care visits, number of emergency department visits,  
52  
53 312 polypharmacy, and receipt of home care.  
54  
55

56  
57 313 Naseer et al (31) have also shown that prior healthcare use is associated with emergency  
58  
59 314 department revisits within 30 days, in older adults. Similarly, we have identified previous healthcare  
60

1  
2  
3 315 use as a risk factor of possibly medication-related readmissions within 30 days of discharge (10)  
4  
5 316 which is why this factor was included in the HOME Score. Prior healthcare use has also been  
6  
7 317 indicated as a risk factor for all-cause readmission (23, 27, 28) and the factor is included in the  
8  
9 318 HOSPITAL Score (27) as well as in the LACE Index (28).  
10  
11  
12

### 13 319 Living in own home with home care and/or alone

14  
15  
16 320 Living in your own home alone is included as a variable in the HOME Score as well as in the PRIME  
17  
18 321 tool (16). Living arrangements have been previously indicated as risk factors for readmission in  
19  
20 322 several studies. In 2016 Olson et al (32) identified an increased risk of readmission in older men  
21  
22 323 living in their own home with only their adult children as caregivers. Further, Gruneir et al (33) have  
23  
24 324 shown that patients using high-risk medications have an 80% increased risk of readmission within 30  
25  
26 325 days if discharged to their own home as opposed to a nursing home. However, Naseer et al (31) did  
27  
28 326 not find living alone to be explanatory of emergency department revisits in older adults. They did, on  
29  
30 327 the other hand, find the receipt of home care to be significantly associated with emergency  
31  
32 328 department revisits in one of the two Swedish regions studied. Similarly, Dahlberg et al (34) have  
33  
34 329 shown that living at home with home care is significantly associated with unplanned (emergency)  
35  
36 330 admission to hospital.  
37  
38  
39  
40

41 331 When it comes to readmission to hospital, we have previously shown that living in the community  
42  
43 332 with home care is a risk factor for all-cause readmission (23) and in this study further analyses  
44  
45 333 showed that it is also associated with possibly medication-related readmission. This factor is not, to  
46  
47 334 our knowledge, found in other assessment tools aiming to identify all-cause readmission or possibly  
48  
49 335 medication-related readmission. However, it is part of several comprehensive geriatric assessment  
50  
51 336 tools aiming to identify vulnerability and frailty (35-37). Such comprehensive geriatric assessment  
52  
53 337 tools have also been shown to be predictive of all-cause readmission to hospital within 30 days (35)  
54  
55 338 and 60 days (36) of discharge, in older adults.  
56  
57  
58  
59  
60

### 339 Number of medications at admission $\geq 5$

340 Polypharmacy is a commonly indicated risk factor for medication-related problems in older adults  
341 (38). Polypharmacy, in itself, is not necessarily a bad thing but with age comes bodily changes that  
342 affect the pharmacokinetics and pharmacodynamics of medications. This leads to increased  
343 sensitivity (38, 39) which, in turn, leads to an increased risk of medication-related problems (38). The  
344 presence of polypharmacy (31, 40, 41) and medication-related problems (8, 42) can lead to  
345 increased healthcare use and, as shown in this study, to possibly medication-related readmissions.  
346 Hence, polypharmacy was included in the HOME Score. Similarly, the number of medications used is  
347 included as a risk factor in the PRIME tool (16) as well as in the decision support tool predicting  
348 elderly patients' risk of readmission based on their high-risk medication regimens, developed by  
349 Olson et al (17).

### 350 Emergency admission

351 Emergency admission, as opposed to planned admission, has been indicated as a risk factor for 30-  
352 day readmission in several studies, including ours (10, 23), and the factor is included in both the  
353 HOSPITAL Score (27) and the LACE Index (28).  
354 In the study by Dahlberg et al (34) the only social factor significantly associated with unplanned  
355 hospital admission was living at home with home care. Furthermore, in our previous study, we  
356 showed that older adults with a possibly medication-related readmission who lived alone were more  
357 often readmitted due to an unsustainable home situation than those living with someone (10). Since  
358 living with home care and living alone are also indicated as risk factors for all-cause and possibly  
359 medication-related readmissions, this indicates that these readmitted older adults need closer  
360 supervision after discharge. At the very least they need better planning before discharge. To achieve  
361 this, the collaboration between hospital, primary, and municipal care needs to improve (12, 14).

## 362 **Implications for clinical use**

363 The HOME Score can support healthcare personnel in identifying patients at increased risk of  
364 possibly medication-related readmission. The data needed is easily attainable already at admission  
365 to hospital, thus making it possible to implement inter- and transdisciplinary activities aiming to  
366 improve medication use and transitions of care during the hospital stay as well as at discharge and in  
367 follow-up. The use of the HOME Score could likely help increase the efficiency and effectiveness of  
368 such interventions. This, in turn, could lead to an increase in patient safety as well as benefits to the  
369 health economy. Further studies are needed to test these hypotheses.

## 370 **Strengths and limitations**

371 The HOME Score was developed using data from a retrospective study performed in a population  
372 admitted to a single Swedish hospital. This could limit its generalisability, which is why an external  
373 validation was carried out using data from four other hospitals in another part of Sweden. The tool's  
374 predictive ability was withstanding, suggesting that it can be used when aiming to identify patients  
375 at increased risk of possibly medication-related readmission in Sweden. However, further studies are  
376 needed to assess the international validity of the HOME Score.

377 The population used in developing the HOME Score was tailored for the identification of risk factors  
378 of all-cause readmission and possibly medication-related readmission (10, 23). This led to a larger  
379 proportion of readmitted patients in the development cohort (50%) compared to the proportion in  
380 the validation cohort (15%), the proportion of 30-day readmissions in the validation cohort being  
381 closer to that reported in previous studies (1-3). This could be considered a weakness.

382 The tool AT-HARM10 (24) was used by clinical pharmacists in both the development (10) and  
383 validation cohort (25, 26) in order to assess whether 30-day readmissions were possibly or unlikely  
384 medication-related. Even though the tool has been validated, the assessments are implicit, and the

1  
2  
3 385 result depends on the person conducting them. This could be considered a weakness. However, the  
4  
5 386 fact that the amount of possibly medication-related readmissions was almost the same in the  
6  
7 387 development and validation cohort (40% in the development cohort and 41% in the validation  
8  
9 388 cohort) indicates that this may not be a big issue.

10  
11  
12  
13 389 In the development cohort, included patients were admitted to medical as well as surgical  
14  
15 390 departments whereas patients in the validation cohort were admitted solely to medical wards. This  
16  
17 391 could have affected the results and further validations of the HOME Score are needed in order to  
18  
19 392 establish its clinical usefulness in different departments as well as in other countries.

20  
21  
22 393

## 23 24 25 26 394 **CONCLUSION**

27  
28  
29 395 The HOME Score can be used to identify older adults at increased risk of possibly medication-related  
30  
31 396 readmission within 30 days of discharge. The tool is easy to use and includes variables that are  
32  
33 397 readily available in electronic health records at admission, thus making it possible to implement risk-  
34  
35 398 reducing activities during the hospital stay as well as at discharge and in transitions of care. These  
36  
37 399 activities could likely help increase patient safety as well as be beneficial to the health economy.  
38  
39  
40 400 Further studies are needed to test these hypotheses.

41  
42  
43 401

## 44 45 46 47 402 **ACKNOWLEDGEMENTS**

48  
49  
50 403 We want to thank Patrick O'Reilly for his expertise and advice in editing the manuscript.

51  
52 404 Furthermore, we want to thank Anton Hedman for fast and reliable help with extracting data from  
53  
54 405 the MedBridge trial database.

55  
56 406 This study was accomplished within the context of the Swedish National Graduate School on Ageing  
57  
58  
59 407 and Health (SWEAH).

1  
2  
3  
4 408  
5  
6  
78 409 **STATEMENTS**  
910  
11 410 **Competing interests**  
1213  
14  
15 411 The authors declare that they have no competing interests.  
1617  
18 412 **Author contributions**  
1920  
21 413 All authors have contributed to the design of this study. MG collected, interpreted, and analysed the  
22  
23 414 data with the support of the other authors. The first draft of the manuscript was completed by MG  
24  
25 415 after which it was critically read and commented on by the other authors. All authors have read and  
26  
27 416 approved the final manuscript.  
28  
2930  
31 417 **Funding**  
3233  
34 418 This study was supported by a grant from the ALF funding from Region Skåne, awarded to PM. The  
35  
36 419 study was further supported by doctoral grants from the Research and Development Committee at  
37  
38 420 Kristianstad-Hässleholm Hospitals and the Southern Medical Care Region, awarded to MG. The  
39  
40 421 funding body had no role in the design of the study, the collection, analysis, or interpretation of data  
41  
42 422 or in writing the manuscript.  
43  
44  
4546 423 **Ethics statement**  
4748  
49 424 Ethical approval was applied for and approved by the Swedish Ethics Review Authority (Dnr 2021-  
50  
51 425 06612-01).  
52  
53  
54  
55  
56  
57  
58  
59  
60



## 426 Data Availability Statement

427 In accordance with the Public Access to Information and Secrecy Act (43) Swedish Authorities restrict  
428 public access to the datasets analysed during the current study. However, data can be made available  
429 for research after a special review including approval of the research project by an ethics committee  
430 as well as the authorities' data safety committees. Queries regarding data access are referred to the  
431 corresponding author.

432

## 433 FIGURE LEGEND

434 **Figure 1:** The HOME Score to be used at admission to hospital in order to identify older adults at  
435 increased risk of possibly medication-related readmission within 30 days of discharge.  
436 Hospitalisations within the last 12 months and living in own home, alone and/or with home care,  
437 refer to events and conditions prior to the admission in question.

438

## 439 SUPPORTING INFORMATION

440 **Appendix 1. Assessment Tool for identifying Hospital Admissions Related to Medicine (AT-  
441 HARM10).** Includes the AT-HARM10 assessment tool, instructions for use and representative  
442 examples of when a question should be answered "Yes" or "No".

443

## 444 REFERENCES

- 445 1. Swedish Association of Local Authorities and Regions. Health care in numbers [Internet].  
446 Swedish Association of Local Authorities and Regions; 2022. [Available from:  
447 <https://www.vardenisiffror.se>]. Access date: 19 August 2022. Language: Swedish
- 448 2. Pedersen MK, Meyer G, Uhrenfeldt L. Risk factors for acute care hospital readmission in  
449 older persons in Western countries: a systematic review. *JBI Database System Rev*  
450 *Implement Rep.* 2017;15(2):454-85.
- 451 3. Bailey MK, Weiss AJ, Barrett ML, et al. Characteristics of 30-Day All-Cause Hospital  
452 Readmissions, 2010–2016. 2019 Feb 12. In: Healthcare Cost and Utilization Project (HCUP)  
453 Statistical Briefs [Internet]. Rockville (MD): Agency for Healthcare Research and Quality  
454 (US); 2006 Feb-. Statistical Brief #248. PMID: 30896914
- 455 4. Mudge AM, McRae P, Hubbard RE, et al. Hospital-Associated Complications of Older  
456 People: A Proposed Multicomponent Outcome for Acute Care. *J Am Geriatr Soc.*  
457 2019;67(2):352-6.
- 458 5. Creditor MC. Hazards of hospitalization of the elderly. *Ann Intern Med.* 1993;118(3):219-  
459 23.
- 460 6. Kristensen SR, Bech M, Quentin W. A roadmap for comparing readmission policies with  
461 application to Denmark, England, Germany and the United States. *Health Policy.*  
462 2015;119(3):264-73.
- 463 7. Swedish Association of Local Authorities and Regions. Indicators for consistent health and  
464 social care. 2018. [Available from:  
465 <https://skr.se/download/18.42336a32177c8ab158d3fd70/1615301657651/Indikatorer%20fo%CC%88r%20sammanha%CC%8Allen%20va%CC%8Ard%20-%20en%20va%CC%88gledning.pdf>]. Access date: 14 November 2022. Language: Swedish

- 1  
2  
3 468 8. El Morabet N, Uitvlugt EB, van den Bemt BJJ, et al. Prevalence and Preventability of Drug-  
4  
5 469 Related Hospital Readmissions: A Systematic Review. *J Am Geriatr Soc.* 2018;66(3):602-8.  
6  
7  
8 470 9. Linkens A, Milosevic V, van der Kuy PHM, et al. Medication-related hospital admissions and  
9  
10 471 readmissions in older patients: an overview of literature. *Int J Clin Pharm.* 2020;42(5):1243-  
11  
12 472 51.  
13  
14  
15 473 10. Glans M, Kragh Ekstam A, Jakobsson U, et al. Medication-related hospital readmissions  
16  
17 474 within 30 days of discharge-A retrospective study of risk factors in older adults. *PLoS One.*  
18  
19 475 2021;16(6):e0253024.  
20  
21  
22  
23 476 11. Auerbach AD, Kripalani S, Vasilevskis EE, et al. Preventability and Causes of Readmissions in  
24  
25 477 a National Cohort of General Medicine Patients. *JAMA Intern Med.* 2016;176(4):484-93.  
26  
27  
28 478 12. Uitvlugt EB, Janssen MJA, Siegert CEH, et al. Medication-Related Hospital Readmissions  
29  
30 479 Within 30 Days of Discharge: Prevalence, Preventability, Type of Medication Errors and  
31  
32 480 Risk Factors. *Front Pharmacol.* 2021;12:567424.  
33  
34  
35 481 13. Hesselink G, Schoonhoven L, Barach P, et al. Improving patient handovers from hospital to  
36  
37 482 primary care: a systematic review. *Ann Intern Med.* 2012;157(6):417-28.  
38  
39  
40 483 14. Blachman NL, Blaum CS. Integrating Care Across Disciplines. *Clin Geriatr Med.*  
41  
42 484 2016;32(2):373-83.  
43  
44  
45 485 15. Collins GS, Reitsma JB, Altman DG, et al. Transparent reporting of a multivariable prediction  
46  
47 486 model for individual prognosis or diagnosis (TRIPOD): the TRIPOD statement. *BMJ.*  
48  
49 487 2015;350:g7594.  
50  
51  
52  
53 488 16. Parekh N, Ali K, Davies JG, et al. Medication-related harm in older adults following hospital  
54  
55 489 discharge: development and validation of a prediction tool. *BMJ Qual Saf.* 2020;29(2):142-  
56  
57 490 53.  
58  
59  
60

- 1  
2  
3 491 17. Olson CH, Dierich M, Adam T, et al. Optimization of decision support tool using medication  
4  
5 492 regimens to assess rehospitalization risks. *Appl Clin Inform*. 2014;5(3):773-88.  
6  
7  
8 493 18. Wilson PW, D'Agostino RB, Levy D, et al. Prediction of coronary heart disease using risk  
9  
10 494 factor categories. *Circulation*. 1998;97(18):1837-47.  
11  
12  
13 495 19. Swedish Association of Local Authorities and Regions. Municipalities and regions 2022.  
14  
15 496 [Available from: <https://skr.se/skr/englishpages/municipalitiesandregions.1088.html>].  
16  
17 497 Access date: 14 November 2022. Language: Swedish  
18  
19  
20 498 20. Swedish Government Offices. Law (2017:612) on collaboration at discharge from hospital  
21  
22 499 healthcare. 2018. [Available from: [https://www.riksdagen.se/sv/dokument-](https://www.riksdagen.se/sv/dokument-lagar/dokument/svensk-forfattningssamling/lag-2017612-om-samverkan-vid-utskrivning-fran_sfs-2017-612)  
23  
24 500 [lagar/dokument/svensk-forfattningssamling/lag-2017612-om-samverkan-vid-utskrivning-](https://www.riksdagen.se/sv/dokument-lagar/dokument/svensk-forfattningssamling/lag-2017612-om-samverkan-vid-utskrivning-fran_sfs-2017-612)  
25  
26 501 [fran\\_sfs-2017-612](https://www.riksdagen.se/sv/dokument-lagar/dokument/svensk-forfattningssamling/lag-2017612-om-samverkan-vid-utskrivning-fran_sfs-2017-612)]. Access date: 14 November 2022. Language: Swedish  
27  
28  
29 502 21. Swedish National Board of Health and Welfare. Directives and general advice (HSLF-FS  
30  
31 503 2017:37) on prescription and handling of medicines in health care. Swedish National Board  
32  
33 504 of Health and Welfare; 2017. [Available from:  
34  
35 505 [https://patientsakerhet.socialstyrelsen.se/lagar-och-foreskrifter/foreskrifter-och-](https://patientsakerhet.socialstyrelsen.se/lagar-och-foreskrifter/foreskrifter-och-handbocker/hslf-fs-201737/)  
36  
37 506 [handbocker/hslf-fs-201737/](https://patientsakerhet.socialstyrelsen.se/lagar-och-foreskrifter/foreskrifter-och-handbocker/hslf-fs-201737/)]. Access date: 14 November 2022. Language: Swedish  
38  
39  
40 507 22. Swedish National Board of Health and Welfare. Medication Reviews - A Follow-up and  
41  
42 508 Evaluation of the National Board of Health and Welfare's Regulations About Medication  
43  
44 509 Reviews in Chapter 11. HSLF-FS 2017:37. 2019. [Available from:  
45  
46 510 [https://www.socialstyrelsen.se/globalassets/sharepoint-](https://www.socialstyrelsen.se/globalassets/sharepoint-dokument/artikelkatalog/ovrigt/2019-2-22.pdf)  
47  
48 511 [dokument/artikelkatalog/ovrigt/2019-2-22.pdf](https://www.socialstyrelsen.se/globalassets/sharepoint-dokument/artikelkatalog/ovrigt/2019-2-22.pdf)]. Access date: 14 November 2022.  
49  
50  
51 512 Language: Swedish  
52  
53  
54  
55  
56  
57  
58  
59  
60

- 1  
2  
3 513 23. Glans M, Kragh Ekstam A, Jakobsson U, et al. Risk factors for hospital readmission in older  
4  
5 514 adults within 30 days of discharge - a comparative retrospective study. *BMC Geriatr.*  
6  
7 515 2020;20(1):467.  
8  
9  
10 516 24. Kempen TGH, Hedstrom M, Olsson H, et al. Assessment tool for hospital admissions related  
11  
12 517 to medications: development and validation in older patients. *Int J Clin Pharm.*  
13  
14 518 2019;41(1):198-206.  
15  
16  
17 519 25. Kempen TGH, Bertilsson M, Hadziosmanovic N, et al. Effects of Hospital-Based  
18  
19 520 Comprehensive Medication Reviews Including Postdischarge Follow-up on Older Patients'  
20  
21 521 Use of Health Care: A Cluster Randomized Clinical Trial. *JAMA Netw Open.*  
22  
23 522 2021;4(4):e216303.  
24  
25  
26 523 26. Kempen TGH, Bertilsson M, Lindner KJ, et al. Medication Reviews Bridging Healthcare  
27  
28 524 (MedBridge): Study protocol for a pragmatic cluster-randomised crossover trial. *Contemp*  
29  
30 525 *Clin Trials.* 2017;61:126-32.  
31  
32  
33 526 27. Donze J, Aujesky D, Williams D, et al. Potentially avoidable 30-day hospital readmissions in  
34  
35 527 medical patients: derivation and validation of a prediction model. *JAMA Intern Med.*  
36  
37 528 2013;173(8):632-8.  
38  
39  
40 529 28. van Walraven C, Dhalla IA, Bell C, et al. Derivation and validation of an index to predict  
41  
42 530 early death or unplanned readmission after discharge from hospital to the community.  
43  
44 531 *CMAJ.* 2010;182(6):551-7.  
45  
46  
47 532 29. Gustafsson M, Sjolander M, Pfister B, et al. Pharmacist participation in hospital ward teams  
48  
49 533 and hospital readmission rates among people with dementia: a randomized controlled  
50  
51 534 trial. *Eur J Clin Pharmacol.* 2017;73(7):827-35.  
52  
53  
54  
55  
56  
57  
58  
59  
60

- 1  
2  
3 535 30. Naseer M, McKee JM, Ehrenberg A, et al. Individual and contextual predictors of  
4  
5 536 emergency department visits among community-living older adults: a register-based  
6  
7 537 prospective cohort study. *BMJ Open*. 2022;12(2):e055484.  
8  
9  
10 538 31. Naseer M, Agerholm J, Fastbom J, Schön P, Ehrenberg A, Dahlberg L. Factors associated  
11  
12 539 with emergency department revisits among older adults in two Swedish regions: A  
13  
14 540 prospective cohort study. *Arch Gerontol Geriatr*. 2020;86:103960.  
15  
16  
17 541 32. Olson CH, Dey S, Kumar V, et al. Clustering of elderly patient subgroups to identify  
18  
19 542 medication-related readmission risks. *Int J Med Inform*. 2016;85(1):43-52.  
20  
21  
22 543 33. Gruneir A, Fung K, Fischer HD, et al. Care setting and 30-day hospital readmissions among  
23  
24 544 older adults: a population-based cohort study. *CMAJ*. 2018;190(38):E1124-e33.  
25  
26  
27 545 34. Dahlberg L, Agahi N, Schön P, et al. Planned and Unplanned Hospital Admissions and Their  
28  
29 546 Relationship with Social Factors: Findings from a National, Prospective Study of People  
30  
31 547 Aged 76 Years or Older. *Health Serv Res*. 2018;53(6):4248-67.  
32  
33  
34 548 35. Gregersen M, Hansen TK, Jørgensen BB, et al. Frailty is associated with hospital  
35  
36 549 readmission in geriatric patients: a prognostic study. *Eur Geriatr Med*. 2020;11(5):783-92.  
37  
38  
39 550 36. Stillman GR, Stillman AN, Beecher MS. Frailty Is Associated With Early Hospital Readmission  
40  
41 551 in Older Medical Patients. *J Appl Gerontol*. 2021;40(1):38-46.  
42  
43  
44 552 37. Sternberg SA, Wershof Schwartz A, Karunanathan S, et al. The identification of frailty: a  
45  
46 553 systematic literature review. *J Am Geriatr Soc*. 2011;59(11):2129-38.  
47  
48  
49 554 38. Kim J, Parish AL. Polypharmacy and Medication Management in Older Adults. *Nurs Clin*  
50  
51 555 *North Am*. 2017;52(3):457-68.  
52  
53  
54 556 39. Corsonello A, Pedone C, Incalzi RA. Age-related pharmacokinetic and pharmacodynamic  
55  
56 557 changes and related risk of adverse drug reactions. *Curr Med Chem*. 2010;17(6):571-84.  
57  
58  
59  
60

- 1  
2  
3 558 40. Picker D, Heard K, Bailey TC, et al. The number of discharge medications predicts thirty-day  
4  
5 559 hospital readmission: a cohort study. *BMC Health Serv Res*. 2015;15:282.  
6  
7  
8 560 41. Basnet S, Zhang M, Lesser M, et al. Thirty-day hospital readmission rate amongst older  
9  
10 561 adults correlates with an increased number of medications, but not with Beers  
11  
12 562 medications. *Geriatr Gerontol Int*. 2018;18(10):1513-8.  
13  
14  
15 563 42. Ekerstad N, Bylin K, Karlson BW. Early rehospitalizations of frail elderly patients - the role of  
16  
17 564 medications: a clinical, prospective, observational trial. *Drug Healthc Patient Saf*.  
18  
19 565 2017;9:77-88.  
20  
21  
22  
23 566 43. Government Offices of Sweden. The Public Access to Information and Secrecy Act. 2009.  
24  
25 567 [Available from: [access-to-information-and-secrecy-act/](https://www.government.se/information-material/2009/09/public-<br/>26<br/>27 568 <a href=)]. Access date: 14 November 2022.  
28  
29  
30  
31  
32  
33  
34  
35  
36  
37  
38  
39  
40  
41  
42  
43  
44  
45  
46  
47  
48  
49  
50  
51  
52  
53  
54  
55  
56  
57  
58  
59  
60

## The HOME Score

*Clinical risk score for predicting possibly medication-related readmission within 30 days of discharge - in patients 65 years and older*

|                                                    |                                                     | Points |
|----------------------------------------------------|-----------------------------------------------------|--------|
| <b>Hospitalisations</b>                            | Hospitalisations within the last 12 months $\geq 2$ | 1      |
| <b>Own home</b>                                    | Living in own home, with home care                  | 1      |
|                                                    | Living in own home, alone                           | 1      |
| <b>Medications</b>                                 | Number of medications at admission $\geq 5$         | 1      |
| <b>Emergency admission</b>                         | Emergency admission (as opposed to planned)         | 2      |
| <b>Total</b>                                       |                                                     |        |
| <i>A score of 4 or more denotes increased risk</i> |                                                     |        |



# AT-HARM10 – Instructions

## Assessment Tool for identifying Hospital Admissions Related to Medications

The Assessment Tool for identifying Hospital Admissions Related to Medications (AT-HARM10) is a screening tool consisting of 10 questions used to determine whether a hospital admission is medication-related. A medication-related admission (MRA) is a hospital admission in which a medication related problem (MRP) is either the main cause for admission or a significantly contributing cause for admission (i.e. without the MRP, the patient would not have been admitted). MRPs are defined here as “undesirable patient experiences that involve medication therapy and that actually or potentially interfere with desired patient outcomes”. These not only involve adverse drug reactions to prescribed medication, but can also involve problems such as inappropriate prescribing and non-compliance, and problems related to over-the-counter (OTC) medications. It does not consider whether the admission was preventable (e.g. an admission caused by side effects of appropriate medication treatment is considered medication-related). AT-HARM10 was developed to measure the incidence of possibly medication-related admissions, MRAs.

The user of AT-HARM10 should not have to go through all patient data in the patient’s medical record, because that would take too much time. The patient data from the medical records that will be provided for the assessment includes: admission notes from the current admission, medication list, laboratory data, pharmacists’ notes and the discharge summary for the admission. All registered medications, including over-the-counter (OTC) medication, should be considered in the assessment. Non-registered complementary and alternative medicine (CAM) products and dietary supplements are not to be considered.

The tool comprises 10 questions which can only be answered "Yes" or "No". For further clarification of each question, please see the examples below. Questions 1-3 are used to identify admissions that are unlikely to be medication-related (U), while questions 4-10 are used to identify possibly medication-related (P) admissions. The assessment is finished as soon as the answer "Yes" is given for any question, resulting in the admission being either U or P. This means that it is not necessary to answer the remaining questions when a “Yes” answer has been given. If all the questions are answered "No", the assessment is still indecisive and needs to be examined by an expert panel.

Please note: While the reason for visiting the emergency department (ED) might be non-medication-related (e.g. chest pain, head ache), in some cases the primary cause for admission might turn out to be medication-related (e.g. low potassium levels discovered while at the ED – worsened by a diuretic). In these cases, the admission should be classified as P.

# AT-HARM10

## Assessment Tool for identifying Hospital Admissions Related to Medications

**Note:** Questions 1-3 are used to identify admissions unlikely to be medication-related, while questions 4-10 are used to identify possibly medication-related admissions. The assessment is finished as soon as the answer "Yes" is given for any question → U (unlikely to be medication-related) or P (possibly medication-related). If all the questions are answered with "No", the admission should be classified as P (possibly medication-related).

1. Was the admission caused by an *infection* or a previously *undiagnosed* disease (e.g. diabetes or heart failure) that is *not medication-related*?

Yes → U (unlikely to be medication-related)

No → NQ (next question)

2. Was the admission caused by progression of a previously diagnosed disease that is *not medication-related* (with the progression of several chronic diseases, such as congestive heart failure or diabetes, a medication-related component can rarely be excluded)?

Yes → U

No → NQ

**NOTE:** Appropriateness of medication treatment should only be considered in relation to this question to determine whether the admission is primarily caused by disease progression (*unlikely* MRA) or suboptimal medication treatment or use (*possible* MRA, question 4-10).

3. Was the admission caused by physical trauma, substance intoxication, social circumstances or allergies (e.g. car accident, wasp allergy, alcohol excess, mushroom poisoning) that are *not medication-related*?

Yes → U

No → NQ

- 
4. Is it hinted or stated in the medical record that the admission was *medication-related* (including non-compliance)?

Yes → P (possibly medication-related)

No → NQ

- 1  
2  
3 5. Might (side) effects of the medications the patient was taking (prescribed or non-prescribed)  
4 prior to hospitalisation have caused the admission (including over-treatment)?

5  
6 Yes → P

7  
8 No → NQ

9 **NOTE:** An admission caused by side effects of appropriate medication treatment should be  
10 classified as *possibly* medication-related.  
11  
12  
13

- 14 6. Are there abnormal laboratory results or vital signs that could be *medication-related* and might  
15 have caused the admission?

16  
17 Yes → P

18  
19 No → NQ  
20  
21

- 22 7. Was there any drug-drug interaction or drug-disease interaction (i.e. a contraindication) that  
23 might have caused the admission?

24  
25 Yes → P

26  
27 No → NQ  
28  
29

- 30 8. Did the patient have any *previously* diagnosed untreated or suboptimally treated (e.g. dose too  
31 low) indications that might have caused the admission?

32  
33 Yes → P

34  
35 No → NQ  
36  
37

- 38 9. Was the patient admitted because of a problem with the dosage form or pharmaceutical  
39 formulation (i.e. failure to receive the medication)?

40  
41 Yes → P

42  
43 No → NQ  
44  
45

- 46 10. Is the cause of the admission a response to cessation or withdrawal of medication therapy?

47  
48 Yes → P

49 No → P (the tool has not been able to rule out that the admission is medication-related)  
50  
51  
52  
53  
54  
55  
56  
57  
58  
59  
60

# AT-HARM10 – Examples

## Assessment Tool for identifying Hospital Admissions Related to Medications

Representative examples of when a question should be answered "Yes" or "No".

1. Was the admission caused by an *infection* or a previously *undiagnosed* disease (e.g. diabetes or heart failure) that is *not medication-related*?

**Yes:** A patient admitted because of pneumonia that was *not related* to the patient's *medications*.

**Yes:** A patient admitted because of rectal bleeding found, after investigation, to have been caused by a tumour.

**Yes:** A patient admitted with an unclear diagnosis and new symptoms. The symptoms cannot be explained by the patient's current medications.

**No:** A patient receiving immunosuppressive treatment admitted with infection.

**No:** A patient admitted with new symptoms indicating heart failure (oedema, shortness of breath) and a history of excessive use of non-steroidal anti-inflammatory drugs (NSAIDs).

2. Was the admission caused by progression of a previously diagnosed disease that is *not medication-related*?

**NOTE:** Appropriateness of medication treatment should only be considered in relation to this question to determine whether the admission is primarily caused by disease progression (*unlikely MRA*) or suboptimal medication treatment or use (*possible MRA*, question 4-10).

**Yes:** A patient admitted because of progression of cancer that is not related to the patient's medications.

**Yes:** A patient admitted because of exacerbation of congestive heart-failure, which worsened despite optimal treatment (the medication therapy seems to follow the applicable treatment guidelines) and with no signs of non-compliance.

**No:** A diabetic patient admitted because of hyperglycaemia without other reason for admission (hyperglycaemia should never lead to admission in a patient that is optimally treated).

3. Was the admission caused by physical trauma, substance intoxication, social circumstances or allergies (e.g. car accident, wasp allergy, alcohol excess, mushroom poisoning) that are *not medication-related*?

**Yes:** A patient admitted because of alcohol intoxication or a car accident that was *not related* to the use of the patient's *medications*.

**No:** A patient admitted because of alcohol intoxication worsened by the concomitant use of sedatives.

- 1  
2  
3  
4  
5  
6  
7  
8  
9
- 
4. Is it hinted or stated in the medical record that the admission is *medication-related* (including non-compliance)?

10  
11  
12  
13  
14  
15  
16  
17  
18  
19  
20  
21  
22  
23  
24  
25  
26  
27  
28  
29  
30  
31  
32  
33  
34  
35  
36  
37  
38  
39  
40  
41  
42  
43  
44  
45  
46  
47  
48  
49  
50  
51  
52  
53  
54  
55  
56  
57  
58  
59  
60

**Yes:** A physician states in the discharge note that the patient was admitted because of constipation caused by the lack of laxative therapy during treatment with a strong opioid.

**Yes:** A patient admitted because of an epileptic seizure and a note in the medical records that the patient is known to be non-compliant.

5. Might (side) effects of the medications the patient was taking (prescribed or non-prescribed) prior to hospitalisation have caused the admission (including over-treatment)?

**NOTE:** An admission caused by side effects of appropriate medication treatment should be classified as *possibly* medication-related.

**Yes:** A patient admitted with gastric bleeding who uses acetylsalicylic acid to prevent thrombotic events (regardless of the presence of a correct indication and the use of a proton pump inhibitor for gastric protection).

**Yes:** A patient admitted because of lactic acidosis after continuing medication with metformin while experiencing dehydrating stomach flu.

**Yes:** A patient who uses antihypertensive medication and was admitted due to a fall caused by orthostatic hypotension.

6. Are there abnormal laboratory results or vital signs that could be *medication-related* and might have caused the admission?

**Yes:** A patient admitted with a serum digoxin concentration of 3.4 nmol/L (toxic concentration) which may have been the cause for admission.

**Yes:** A patient admitted because of hypokalaemia (s-potassium < 3.5 mmol/L) and prescribed a diuretic.

**Yes:** A patient with epilepsy admitted with seizures and prescribed a seemingly adequate dose of carbamazepine but with a measured plasma concentration that is too low.

7. Was there any *drug-drug interaction* or *drug-disease interaction* (i.e. a contraindication) that might have caused the admission?

**Yes:** A patient admitted because of gastrointestinal bleeding who was taking diclofenac and warfarin in combination before admission.

**Yes:** A patient admitted because of serotonin syndrome who was taking tramadol, citalopram and mirtazapine.

1  
2  
3 **Yes:** A patient, previously diagnosed with bilateral renal artery stenosis, admitted because of  
4 acute renal failure after taking an ACE inhibitor.

5  
6 **Yes:** A patient with dementia, who has recently been prescribed an anticholinergic medication  
7 (e.g. hydroxyzine), admitted with confusion.  
8  
9

- 10  
11 8. Did the patient have any, *previously* diagnosed, untreated or suboptimally treated (e.g. dose too  
12 low) indications that might have caused the admission?  
13

14 **Yes:** A patient diagnosed with congestive heart failure, who was taking only a starting dose of  
15 ACE-inhibitor (unjustifiably low dose), admitted because of fluid retention and dyspnoea.

16 **Yes:** A patient admitted because of a hip fracture who had a prior diagnosis of osteoporosis but  
17 was not taking osteoporosis prophylaxis.  
18  
19

- 20  
21  
22 9. Was the patient admitted because of a problem with the dosage form or pharmaceutical  
23 formulation (i.e. failure to receive the medication)?  
24

25 **Yes:** A patient admitted with worsening asthma who was found to be unable to use the inhalers  
26 correctly.  
27

28 **Yes:** A patient admitted with palpitations who was found to be unable to swallow tablets and  
29 had been crushing slow-release antihypertensive tablets that should have been swallowed whole  
30 to retain their slow-release effects.  
31  
32

- 33  
34  
35 10. Is the cause of the admission a response to cessation or withdrawal of medication therapy?  
36

37 **Yes:** A patient whose prednisolone treatment has been discontinued too abruptly admitted with  
38 nausea, vomiting and diarrhoea.  
39  
40  
41  
42  
43  
44  
45  
46  
47  
48  
49  
50  
51  
52  
53  
54  
55  
56  
57  
58  
59  
60

## TRIPOD Checklist: Prediction Model Development and Validation

| Section/Topic                | Item | Checklist Item | Page                                                                                                                                                                                                  |              |
|------------------------------|------|----------------|-------------------------------------------------------------------------------------------------------------------------------------------------------------------------------------------------------|--------------|
| <b>Title and abstract</b>    |      |                |                                                                                                                                                                                                       |              |
| Title                        | 1    | D;V            | Identify the study as developing and/or validating a multivariable prediction model, the target population, and the outcome to be predicted.                                                          | 1            |
| Abstract                     | 2    | D;V            | Provide a summary of objectives, study design, setting, participants, sample size, predictors, outcome, statistical analysis, results, and conclusions.                                               | 1-2          |
| <b>Introduction</b>          |      |                |                                                                                                                                                                                                       |              |
| Background and objectives    | 3a   | D;V            | Explain the medical context (including whether diagnostic or prognostic) and rationale for developing or validating the multivariable prediction model, including references to existing models.      | 3-4          |
|                              | 3b   | D;V            | Specify the objectives, including whether the study describes the development or validation of the model or both.                                                                                     | 4            |
| <b>Methods</b>               |      |                |                                                                                                                                                                                                       |              |
| Source of data               | 4a   | D;V            | Describe the study design or source of data (e.g., randomized trial, cohort, or registry data), separately for the development and validation data sets, if applicable.                               | 5-6, 7-8     |
|                              | 4b   | D;V            | Specify the key study dates, including start of accrual; end of accrual; and, if applicable, end of follow-up.                                                                                        | 5, 7         |
| Participants                 | 5a   | D;V            | Specify key elements of the study setting (e.g., primary care, secondary care, general population) including number and location of centres.                                                          | 5, 7         |
|                              | 5b   | D;V            | Describe eligibility criteria for participants.                                                                                                                                                       | 5, 7         |
|                              | 5c   | D;V            | Give details of treatments received, if relevant.                                                                                                                                                     | -            |
| Outcome                      | 6a   | D;V            | Clearly define the outcome that is predicted by the prediction model, including how and when assessed.                                                                                                | 5            |
|                              | 6b   | D;V            | Report any actions to blind assessment of the outcome to be predicted.                                                                                                                                | 6            |
| Predictors                   | 7a   | D;V            | Clearly define all predictors used in developing or validating the multivariable prediction model, including how and when they were measured.                                                         | 6            |
|                              | 7b   | D;V            | Report any actions to blind assessment of predictors for the outcome and other predictors.                                                                                                            | 6            |
| Sample size                  | 8    | D;V            | Explain how the study size was arrived at.                                                                                                                                                            | Prev study   |
| Missing data                 | 9    | D;V            | Describe how missing data were handled (e.g., complete-case analysis, single imputation, multiple imputation) with details of any imputation method.                                                  | Prev study   |
| Statistical analysis methods | 10a  | D              | Describe how predictors were handled in the analyses.                                                                                                                                                 | 6            |
|                              | 10b  | D              | Specify type of model, all model-building procedures (including any predictor selection), and method for internal validation.                                                                         | 6-7          |
|                              | 10c  | V              | For validation, describe how the predictions were calculated.                                                                                                                                         | 8            |
|                              | 10d  | D;V            | Specify all measures used to assess model performance and, if relevant, to compare multiple models.                                                                                                   | 6-7,8        |
|                              | 10e  | V              | Describe any model updating (e.g., recalibration) arising from the validation, if done.                                                                                                               | -            |
| Risk groups                  | 11   | D;V            | Provide details on how risk groups were created, if done.                                                                                                                                             | 7            |
| Development vs. validation   | 12   | V              | For validation, identify any differences from the development data in setting, eligibility criteria, outcome, and predictors.                                                                         | 7            |
| <b>Results</b>               |      |                |                                                                                                                                                                                                       |              |
| Participants                 | 13a  | D;V            | Describe the flow of participants through the study, including the number of participants with and without the outcome and, if applicable, a summary of the follow-up time. A diagram may be helpful. | 11-12        |
|                              | 13b  | D;V            | Describe the characteristics of the participants (basic demographics, clinical features, available predictors), including the number of participants with missing data for predictors and outcome.    | Prev studies |
|                              | 13c  | V              | For validation, show a comparison with the development data of the distribution of important variables (demographics, predictors and outcome).                                                        | 13           |
| Model development            | 14a  | D              | Specify the number of participants and outcome events in each analysis.                                                                                                                               | 11-12        |
|                              | 14b  | D              | If done, report the unadjusted association between each candidate predictor and outcome.                                                                                                              | -            |
| Model specification          | 15a  | D              | Present the full prediction model to allow predictions for individuals (i.e., all regression coefficients, and model intercept or baseline survival at a given time point).                           | 9            |
|                              | 15b  | D              | Explain how to use the prediction model.                                                                                                                                                              | 10, Fig 1    |
| Model performance            | 16   | D;V            | Report performance measures (with CIs) for the prediction model.                                                                                                                                      | 9, 10, 13    |
| Model-updating               | 17   | V              | If done, report the results from any model updating (i.e., model specification, model performance).                                                                                                   | -            |
| <b>Discussion</b>            |      |                |                                                                                                                                                                                                       |              |
| Limitations                  | 18   | D;V            | Discuss any limitations of the study (such as nonrepresentative sample, few events per predictor, missing data).                                                                                      | 18-19        |
| Interpretation               | 19a  | V              | For validation, discuss the results with reference to performance in the development data, and any other validation data.                                                                             | 14,18        |
|                              | 19b  | D;V            | Give an overall interpretation of the results, considering objectives, limitations, results from similar studies, and other relevant evidence.                                                        | 14-17        |
| Implications                 | 20   | D;V            | Discuss the potential clinical use of the model and implications for future research.                                                                                                                 | 17-18        |
| <b>Other information</b>     |      |                |                                                                                                                                                                                                       |              |
| Supplementary information    | 21   | D;V            | Provide information about the availability of supplementary resources, such as study protocol, Web calculator, and data sets.                                                                         | 20           |
| Funding                      | 22   | D;V            | Give the source of funding and the role of the funders for the present study.                                                                                                                         | 19           |

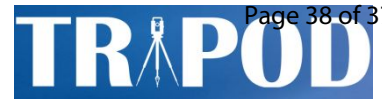

## TRIPOD Checklist: Prediction Model Development and Validation

1  
2 \*Items relevant only to the development of a prediction model are denoted by D, items relating solely to a validation of a prediction model are  
3 denoted by V, and items relating to both are denoted D;V. We recommend using the TRIPOD Checklist in conjunction with the TRIPOD  
4 Explanation and Elaboration document.  
5  
6  
7  
8  
9  
10  
11  
12  
13  
14  
15  
16  
17  
18  
19  
20  
21  
22  
23  
24  
25  
26  
27  
28  
29  
30  
31  
32  
33  
34  
35  
36  
37  
38  
39  
40  
41  
42  
43  
44  
45  
46  
47  
48  
49  
50  
51  
52  
53  
54  
55  
56  
57  
58  
59  
60

For peer review only



# BMJ Open

## Identifying older adults at increased risk of medication-related readmission to hospital within 30 days of discharge - development and validation of a risk assessment tool

|                                 |                                                                                                                                                                                                                                                                                                                                                                                                                                                                                                                                                                                                                                                                                                                                                                                                                                                                                                                            |
|---------------------------------|----------------------------------------------------------------------------------------------------------------------------------------------------------------------------------------------------------------------------------------------------------------------------------------------------------------------------------------------------------------------------------------------------------------------------------------------------------------------------------------------------------------------------------------------------------------------------------------------------------------------------------------------------------------------------------------------------------------------------------------------------------------------------------------------------------------------------------------------------------------------------------------------------------------------------|
| Journal:                        | <i>BMJ Open</i>                                                                                                                                                                                                                                                                                                                                                                                                                                                                                                                                                                                                                                                                                                                                                                                                                                                                                                            |
| Manuscript ID                   | bmjopen-2022-070559.R1                                                                                                                                                                                                                                                                                                                                                                                                                                                                                                                                                                                                                                                                                                                                                                                                                                                                                                     |
| Article Type:                   | Original research                                                                                                                                                                                                                                                                                                                                                                                                                                                                                                                                                                                                                                                                                                                                                                                                                                                                                                          |
| Date Submitted by the Author:   | 06-Jun-2023                                                                                                                                                                                                                                                                                                                                                                                                                                                                                                                                                                                                                                                                                                                                                                                                                                                                                                                |
| Complete List of Authors:       | Glans, Maria; Lund University, Center for Primary Health Care Research, Department of Clinical Sciences, Malmö; Region Skåne, Kristianstad-Hässleholm Hospitals, Department of Medications<br>Kempen, Thomas; Uppsala University, Department of Pharmacy; Utrecht University Utrecht Institute for Pharmaceutical Sciences, Division of Pharmacoepidemiology and Clinical Pharmacology<br>Jakobsson, Ulf; Lund University, Center for Primary Health Care Research, Department of Clinical Sciences, Malmö<br>Kragh Ekstam, Annika; Region Skåne, Kristianstad-Hässleholm Hospitals, Department of Orthopaedics<br>Bondesson, Åsa; Region Skåne, Department of Medicines Management and Informatics; Lund University, Center for Primary Health Care Research, Department of Clinical Sciences, Malmö<br>Midlöv, Patrik ; Lund University, Center for Primary Health Care Research, Department of Clinical Sciences, Malmö |
| <b>Primary Subject Heading</b>: | Geriatric medicine                                                                                                                                                                                                                                                                                                                                                                                                                                                                                                                                                                                                                                                                                                                                                                                                                                                                                                         |
| Secondary Subject Heading:      | Health services research                                                                                                                                                                                                                                                                                                                                                                                                                                                                                                                                                                                                                                                                                                                                                                                                                                                                                                   |
| Keywords:                       | Risk management < HEALTH SERVICES ADMINISTRATION & MANAGEMENT, GERIATRIC MEDICINE, Health & safety < HEALTH SERVICES ADMINISTRATION & MANAGEMENT, Quality in health care < HEALTH SERVICES ADMINISTRATION & MANAGEMENT                                                                                                                                                                                                                                                                                                                                                                                                                                                                                                                                                                                                                                                                                                     |
|                                 |                                                                                                                                                                                                                                                                                                                                                                                                                                                                                                                                                                                                                                                                                                                                                                                                                                                                                                                            |

SCHOLARONE™  
Manuscripts



I, the Submitting Author has the right to grant and does grant on behalf of all authors of the Work (as defined in the below author licence), an exclusive licence and/or a non-exclusive licence for contributions from authors who are: i) UK Crown employees; ii) where BMJ has agreed a CC-BY licence shall apply, and/or iii) in accordance with the terms applicable for US Federal Government officers or employees acting as part of their official duties; on a worldwide, perpetual, irrevocable, royalty-free basis to BMJ Publishing Group Ltd ("BMJ") its licensees and where the relevant Journal is co-owned by BMJ to the co-owners of the Journal, to publish the Work in this journal and any other BMJ products and to exploit all rights, as set out in our [licence](#).

The Submitting Author accepts and understands that any supply made under these terms is made by BMJ to the Submitting Author unless you are acting as an employee on behalf of your employer or a postgraduate student of an affiliated institution which is paying any applicable article publishing charge ("APC") for Open Access articles. Where the Submitting Author wishes to make the Work available on an Open Access basis (and intends to pay the relevant APC), the terms of reuse of such Open Access shall be governed by a Creative Commons licence – details of these licences and which [Creative Commons](#) licence will apply to this Work are set out in our licence referred to above.

Other than as permitted in any relevant BMJ Author's Self Archiving Policies, I confirm this Work has not been accepted for publication elsewhere, is not being considered for publication elsewhere and does not duplicate material already published. I confirm all authors consent to publication of this Work and authorise the granting of this licence.

1  
2  
3  
4 1 **Identifying older adults at increased risk of medication-related readmission to**  
5  
6  
7  
8 2 **hospital within 30 days of discharge - development and validation of a risk**  
9  
10  
11  
12 3 **assessment tool**  
13  
14

15 4 *Maria Glans<sup>\*,1,2</sup>, Thomas Gerardus Hendrik Kempen<sup>3,4</sup>, Ulf Jakobsson<sup>1</sup>, Annika Kragh Ekstam<sup>5</sup>, Åsa*  
16  
17 5 *Bondesson<sup>1,6</sup>, Patrik Midlöv<sup>1</sup>*

18  
19  
20 6 <sup>1</sup> Center for Primary Health Care Research, Department of Clinical Sciences Malmö, Lund University,  
21  
22  
23 7 Malmö, Sweden

24  
25  
26 8 <sup>2</sup> Department of Medications, Kristianstad-Hässleholm Hospitals, Region Skåne, Kristianstad, Sweden

27  
28  
29 9 <sup>3</sup> Department of Pharmacy, Uppsala University, Uppsala, Sweden

30  
31  
32 10 <sup>4</sup> Division of Pharmacoepidemiology and Clinical Pharmacology, Utrecht Institute of Pharmaceutical  
33  
34 11 Sciences, Utrecht University, Utrecht, the Netherlands

35  
36  
37 12 <sup>5</sup> Department of Orthopaedics, Kristianstad-Hässleholm Hospitals, Region Skåne, Kristianstad,  
38  
39 13 Sweden

40  
41  
42 14 <sup>6</sup> Department of Medicines Management and Informatics in Skåne County, Region Skåne,  
43  
44 15 Kristianstad, Sweden

45  
46  
47 16  
48  
49 17 \* Corresponding author:

50  
51  
52 18 Maria Glans

53  
54  
55 19 E-mail: maria.glans@med.lu.se

56  
57  
58 20 Postal address: Center for Primary Health Care Research, Department of Clinical Sciences, Malmö  
59  
60

1  
2  
3 21 Lund University, Clinical Research Center, Box 50332, 20213 Malmö, Sweden  
4  
5  
6 22  
7  
8

9 23 **Word count:** 4886 words  
10  
11  
12 24  
13  
14

## 15 25 **KEYWORDS**

16  
17  
18 26 Older adults; Transitions in care; Patient discharge; Patient readmission; Risk factors; Risk  
19 27 assessment  
20  
21  
22  
23  
24 28

## 25 26 27 29 **ABSTRACT**

### 28 29 30 30 **Objective**

31 31 Developing and validating a risk assessment tool aiming to identify older adults ( $\geq 65$  years) at  
32 32 increased risk of possibly medication-related readmission to hospital within 30 days of discharge.  
33  
34  
35  
36  
37  
38

### 39 33 **Design**

40  
41  
42 34 Retrospective cohort study.  
43  
44  
45

### 46 35 **Setting**

47  
48  
49 36 The risk score was developed using data from a hospital in southern Sweden and validated using  
50 37 data from four hospitals in the mid-eastern part of Sweden.  
51  
52  
53

### 54 38 **Participants**

55  
56  
57 39 The development cohort (n=720) was admitted to hospital during 2017 whereas the validation  
58 40 cohort (n=892) was admitted during 2017-2018.  
59  
60

## 41 Measures

42 The risk assessment tool aims to predict possibly medication-related readmission to hospital within  
43 30 days of discharge. Variables known at first admission and individually associated with possibly  
44 medication-related readmission were used in development. The included variables were assigned  
45 points and Youden's index was used to decide a threshold score. The risk score was calculated for all  
46 individuals in both cohorts. Area under the ROC-curve (c-index) was used to measure the  
47 discrimination of the developed risk score. Sensitivity, specificity, and positive and negative  
48 predictive values were calculated using cross-tabulation.

## 49 Results

50 The developed risk assessment tool, the HOME Score, had a c-index of 0.69 in the development  
51 cohort and 0.65 in the validation cohort. It showed sensitivity 76%, specificity 54%, positive  
52 predictive value 29%, and negative predictive value 90% at the threshold score in the development  
53 cohort.

## 54 Conclusion

55 The HOME Score can be used to identify older adults at increased risk of possibly medication-related  
56 readmission within 30 days of discharge. The tool is easy to use and includes variables available in  
57 electronic health records at admission, thus making it possible to implement risk-reducing activities  
58 during the hospital stay as well as at discharge and in transitions of care. Further studies are needed  
59 to investigate the clinical usefulness of the HOME Score as well as the benefits of implemented  
60 activities.

61

## 62 STRENGTHS AND LIMITATIONS OF THIS STUDY

- 63 • In this study a risk assessment tool - the HOME Score – aiming to identify older adults ( $\geq 65$   
64 years) at increased risk of possibly medication-related readmission to hospital within 30 days of  
65 discharge was developed and externally validated.
- 66 • Only variables available in the electronic health records at admission to hospital were included in  
67 the risk assessment tool.
- 68 • Possibly medication-related readmissions were identified using the same tool, AT-HARM10, in  
69 both the development cohort and the validation cohort.
- 70 • Further validations of the HOME Score are needed in order to establish its clinical usefulness in  
71 different departments as well as in other countries.

## 73 INTRODUCTION

74 Readmission to hospital is common, especially in older adults where almost 20% of discharges result  
75 in a readmission within 30 days (1-3). In older adults, hospitalisation can be associated with a risk of  
76 complications such as exposure to infections, rise in adverse events, episodes of confusion, and  
77 accidental injury through falls (4, 5). As readmissions are not only a risk for the individual patient but  
78 also for the health economy (3), many countries have set goals to decrease the frequency of  
79 readmission within 30 days of discharge (3, 6, 7).

80 According to previous research (8-10) a relatively large proportion of readmissions to hospital, in  
81 older adults, is medication-related. However, the amount differs greatly between studies as shown  
82 in a systematic review by El Morabet et al (8). In this study the amount of medication-related  
83 readmission reported was 3-64% with a median of 21% (interquartile range 14-23%). These  
84 differences are due to a number of factors, one being the use of different definitions of “medication-  
85 related” between studies (8). While some studies measure readmissions related to adverse drug

1  
2  
3 86 reactions, adverse drug events, or drug-drug reactions others measure readmissions related to  
4  
5 87 medication-related problems, thus including all the above-mentioned problems (8).  
6  
7  
8 88 Many medication-related readmissions may be possible to prevent, even though the proportion  
9  
10 89 deemed preventable also differs between studies (8), again, due to differences in methods used.  
11  
12  
13 90 According to previous research, preventive measures should aim to improve medication use as well  
14  
15 91 as transitions of care (11, 12) and are best performed by combining several minor activities into  
16  
17 92 concepts (12, 13). These activities should preferably include interdisciplinary actions during the  
18  
19 93 hospital stay and at discharge (12) as well as collaboration between hospital, primary, and municipal  
20  
21 94 care in transitions of care (14).  
22  
23  
24  
25 95 To effectively implement interventions, healthcare personnel need to be able to identify patients at  
26  
27 96 increased risk of medication-related readmission. This could preferably be done by using a risk  
28  
29 97 assessment tool or risk score (15). Some risk assessment tools linked to medication-related  
30  
31 98 readmission have been developed (16, 17). The PRIME tool, developed by Parekh et al (16),  
32  
33 99 identifies older adults at increased risk of medication-related harm requiring healthcare use within  
34  
35  
36 100 eight weeks of discharge while the decision support tool developed by Olson et al (17) predicts the  
37  
38 101 risk of readmission in older adults using high-risk medication regimens. None of these tools have  
39  
40 102 been validated in an external population or tested in a setting other than the one where it was  
41  
42 103 developed.  
43  
44  
45 104 To our knowledge, there is no risk assessment tool available that specifically aims to identify older  
46  
47 105 adults at increased risk of possibly medication-related readmission to hospital within 30 days of  
48  
49 106 discharge. If such a tool was available, interventions aiming to prevent readmission could be  
50  
51 107 implemented based on the risk in the individual patient (15). This could make it possible to not only  
52  
53 108 increase patient safety but also relocate some resources to other areas within healthcare.  
54  
55  
56  
57 109  
58  
59  
60

## 110 OBJECTIVE

111 The aim of this study was to develop and validate a risk assessment tool that can be used to identify  
112 older adults ( $\geq 65$  years) at increased risk of possibly medication-related readmission to hospital  
113 within 30 days of discharge.

## 115 METHODS

116 This study is reported according to the transparent reporting of a multivariable prediction model for  
117 individual prognosis or diagnosis (TRIPOD) statement (15).

### 118 Setting

119 Sweden is divided into 21 regions and 290 municipalities (18). Primary and hospital care is provided  
120 by the regions while nursing care, in the community or in nursing homes, is provided by the local  
121 municipalities. When it comes to planning patient care after hospital discharge, hospital and  
122 municipal care are expected to collaborate (19).

123 According to Swedish directives and general advice (20), a medication reconciliation should be  
124 performed by the attending physician when patients aged 75 years and older using five medications  
125 or more are admitted to hospital. In performing the medication reconciliation, the attending  
126 physician can be supported by other healthcare personnel, e.g. a clinical pharmacist.

127 If medication-related problems are present, the medication reconciliation should be followed by a  
128 medication review which could or could not be performed interdisciplinary (i.e. involving a  
129 geriatrician or a clinical pharmacist). Unfortunately, adherence to these directives seems generally  
130 low (21) with only about 15% of patients aged 75 years and older receiving a medication  
131 reconciliation and/or medication review during their hospital stay (21).



## 132 Patient and public involvement

133 Patients or the public were not involved in this study.

## 134 Development of the risk assessment tool

135 The risk assessment tool was developed using anonymised data and results from our previously  
136 published retrospective studies (10, 22) where further details on the population and methods of  
137 data collection can be found.

## 138 Study sample and procedure

139 The study was conducted at Kristianstad hospital, which is an emergency hospital with 255 beds  
140 situated in Skåne county in the south of Sweden. The study population, which is further referred to  
141 as the development cohort, consisted of randomly selected patients (n=720), aged 65 years and  
142 older, who had been admitted to Kristianstad hospital for at least 24 hours in 2017. Patients were  
143 admitted to one of the following departments: internal medicine, infectious disease, general  
144 surgery, orthopaedics, or ear/nose/throat. The study group (n=360) was readmitted to any  
145 department in the hospital, for at least 24 hours, within 30 days of discharge while the comparison  
146 group (n=360) was not. Variables were collected from electronic health records in an unblinded yet  
147 standardised and objective manner, as previously described (22).

148 In total 143 of 360 readmissions (39.7%) were assessed as being possibly medication-related (10).  
149 Assessments were made using the Assessment Tool for identifying Hospital Admissions Related to  
150 Medication (AT-HARM10), a validated tool to distinguish between admissions that are possibly and  
151 unlikely medication-related (23). With AT-HARM10 a possibly medication-related  
152 (re-)admission is defined as being either caused by or significantly contributed to by a medication-  
153 related problem and a medication-related problem is defined according to Strand (24), i.e. as an  
154 “undesirable patient experience that involves medication therapy and that actually or potentially

1  
2  
3 155 interferes with desired patient outcomes” (23). This means that medication-related problems  
4  
5 156 involve not only adverse drug reactions or adverse drug events but also problems such as  
6  
7 157 inappropriate prescribing, non-compliance, and problems related to over-the-counter medications  
8  
9  
10 158 (23). For further details on AT-HARM10, see Appendix 1.  
11

12  
13 159 Preliminary assessments, made by the first author in an unblinded fashion, were reviewed, revised,  
14  
15 160 and finalised by an experienced geriatrician. For further details on the assessment process see our  
16  
17 161 previous publication (10).  
18

19  
20 162 Through multiple logistic regression analysis (stepwise backward) individual risk factors associated  
21  
22 163 with all-cause readmission, possibly medication-related readmission, and unlikely medication-  
23  
24 164 related readmission within 30 days of discharge were identified, as described in our previous  
25  
26 165 publications (10, 22).  
27  
28

### 30 166 Variables included

31  
32  
33 167 The risk assessment tool was developed using variables identified by comparing patients with a  
34  
35 168 possibly medication-related readmission (n=143) with those that did not have a possibly medication-  
36  
37 169 related readmission (n=577) (i.e. patients with an unlikely medication-related readmission (n=217)  
38  
39 170 and patients not readmitted (n=360)). Only variables known at first admission to hospital were  
40  
41 171 included in the development of the risk assessment tool.  
42  
43

44  
45 172 Variables shown to be associated with possibly medication-related readmission, through multiple  
46  
47 173 logistic regression analysis, were chosen to be included in the final risk assessment tool. For  
48  
49 174 continuous variables, categorical variables were created based on comparisons between groups.  
50  
51

### 52 175 Data analysis

53  
54  
55  
56 176 Based on the odds ratios of the individual variables in the final multiple logistic regression model,  
57  
58 177 suitable weighting and scoring were decided upon for each of the included variables. A risk score,  
59  
60

1  
2  
3 178 which summarised the points assigned to each of the variables included, was calculated for all the  
4  
5 179 included individuals. Finally, a new logistic regression analysis was performed with possibly  
6  
7 180 medication-related readmission as the dependent variable and the risk score as the test variable,  
8  
9 181 saving the probabilities for further analysis. To estimate the quality of the model Hosmer and  
10  
11  
12 182 Lemeshow goodness-of-fit was calculated as well as Nagelkerke R<sup>2</sup>.

13  
14  
15 183 A ROC-curve was plotted using the saved probabilities and the area under the ROC-curve (c-index)  
16  
17 184 was calculated giving a measure of how well the tool predicts possibly medication-related  
18  
19 185 readmission.

20  
21  
22 186 To decide upon a suitable threshold value in the risk assessment tool Youdens' index ( $J = \text{Sensitivity} +$   
23  
24 187  $\text{Specificity} - 1$ ) was calculated for all steps in the risk score. Cross-tabulation was used to calculate  
25  
26 188 sensitivity, specificity, and positive and negative predictive values as well as to identify the number  
27  
28 189 of correctly predicted patients.

29  
30  
31  
32 190 Statistical analyses were performed using IBM SPSS Statistics version 27.

### 33 34 35 191 **External validation of the risk score**

36  
37  
38 192 To check the predictive ability of the risk score, as well as its precision and usefulness in other  
39  
40 193 populations, we performed an external validation using data from the Medication Reviews Bridging  
41  
42 194 Healthcare (MedBridge) trial (25, 26).

### 43 44 45 46 195 **Study sample and procedure**

47  
48  
49 196 The MedBridge trial (25, 26) was a randomised clinical trial conducted at four hospitals (Uppsala,  
50  
51 197 Gävle, Västerås, and Enköping) in the mid-eastern part of Sweden. The aim of the trial was to study  
52  
53 198 the effects of hospital-based medication reviews including post-discharge follow-up on the use of  
54  
55 199 healthcare resources in older adults ( $\geq 65$  years), compared with hospital-based reviews and usual  
56  
57 200 care only.

1  
2  
3 201 Included participants were admitted to a medical ward at one of the four included hospitals for at  
4  
5 202 least 24 hours within the time-frame 6<sup>th</sup> of February 2017 to the 19<sup>th</sup> of October 2018. Out of the  
6  
7 203 2637 patients included in the trial, 1745 were included in one of the two medication review groups,  
8  
9 204 and 892 patients were included in the group receiving usual care. Outcomes measured in the trial  
10  
11 205 included readmission to hospital within 30 days of discharge and possibly medication-related  
12  
13 206 readmission as assessed with AT-HARM10 (24). For further details on the population and methods of  
14  
15 207 data collection used in the MedBridge trial, see Kempen et al (25).  
16  
17  
18  
19 208 To make sure the medication review interventions in the MedBridge trial could not affect the result  
20  
21 209 of the validation, the MedBridge control group, i.e. the 892 patients receiving usual care, was chosen  
22  
23 210 to create the validation cohort in which the developed risk assessment tool was validated. In the  
24  
25 211 validation cohort (n=892) 132 patients were readmitted within 30 days of discharge and 54 of these  
26  
27 212 readmissions (40.9%) were assessed as being possibly medication-related.  
28  
29  
30

### 31 213 Data analysis

32  
33  
34  
35 214 A multiple logistic regression analysis with the variables included in the risk assessment tool was  
36  
37 215 performed in the validation cohort, comparing patients with a possibly medication-related  
38  
39 216 readmission (n=54) and those that did not have a possibly medication-related readmission (n=838)  
40  
41 217 (i.e. those with an unlikely medication-related readmission (n=78) and those that were not  
42  
43 218 readmitted within 30 days of discharge (n=760)). To estimate the quality of the model, Hosmer and  
44  
45 219 Lemeshow goodness-of-fit was calculated as well as Nagelkerke R<sup>2</sup>.  
46  
47  
48  
49 220 The risk score was calculated for each of the individuals in the validation cohort and a new logistic  
50  
51 221 regression analysis was performed with possibly medication-related readmission as the dependent  
52  
53 222 variable and the risk score as the test variable. Probabilities were saved and used to plot a ROC-  
54  
55 223 curve where the c-index was calculated giving an estimate of the predictive ability of the risk  
56  
57 224 assessment tool in this external population.  
58  
59  
60

225 Cross-tabulation was used at each of the steps in the risk score to calculate sensitivity, specificity,  
226 and positive and negative predictive values. Furthermore, the number of correctly predicted patients  
227 was identified.

228 Statistical analysis was performed using IBM SPSS Statistics version 27.

229

## 230 RESULTS

### 231 Development of the risk assessment tool

#### 232 Variables included

233 The following variables were shown to be individually associated with possibly medication-related  
234 readmission and chosen to be included in the risk assessment tool: *Number of hospitalisations within*  
235 *the last 12 months, Living in own home with home care, Living in own home alone, Number of*  
236 *medications at admission, and Emergency admission.*

237 For the continuous variables, *Number of hospitalisations within the last 12 months* and *Number of*  
238 *medications at admission*, categorical variables were created based on comparisons of means and  
239 medians between groups.

240 The mean number of hospitalisations in patients with a possibly medication-related readmission was  
241 1.94 and the median was 2. The mean number in the comparison group (including patients not  
242 readmitted and those with a readmission unlikely related to medications) was 1.67 and the median  
243 was 1. Hence, the categorical variable was set as *Hospitalisations within the last 12 months  $\geq 2$* .

244 The mean number of medications at first admission to hospital in patients with a possibly  
245 medication-related readmission and in the comparison group (i.e. patients not readmitted and those  
246 with a readmission unlikely related to medications) was 10.30 and 8.09 respectively, and the median

247 was 10 and 7 respectively. Both the categorical variable *Number of medications at admission*  $\geq 5$  and  
 248 *Number of medications at admission*  $\geq 10$  were tested in the multiple logistic regression model. Both  
 249 variables showed similar odds ratios (2.20 with number of medications  $\geq 5$  and 1.99 with number of  
 250 medications  $\geq 10$ ) and both had significant p-values (0.005 with number of medications  $\geq 5$  and  
 251  $<0.001$  with number of medications  $\geq 10$ ). Finally, we chose to use the categorical variable *Number of*  
 252 *medications at admission*  $\geq 5$  in the final model (Table 1).

253

254 **Table 1. Final multiple logistic regression model from the model development dataset with**  
 255 **possibly medication-related readmission within 30 days of discharge as the outcome variable<sup>a</sup>**

| Variable                                        | OR   | 95%CI for OR | p-value      |
|-------------------------------------------------|------|--------------|--------------|
| Age                                             | 1.00 | 0.98-1.03    | 0.986        |
| Sex                                             | 1.02 | 0.69-1.50    | 0.939        |
| Emergency admission                             | 4.03 | 1.42-11.45   | <b>0.009</b> |
| Hospitalisations in the last 12 months $\geq 2$ | 1.53 | 1.04-2.27    | <b>0.033</b> |
| Medications at admission $\geq 5$               | 2.20 | 1.27-3.80    | <b>0.005</b> |
| Living in own home with home care               | 1.84 | 1.17-2.89    | <b>0.009</b> |
| Living in own home alone                        | 1.59 | 1.06-2.39    | <b>0.026</b> |

256 *Abbreviations: OR – Odds Ratio, CI – Confidence Interval*

257 <sup>a</sup>*Adjusted for gender and age.*

258 *Hosmer Lemeshow goodness of fit test p-value: 0.802. Nagelkerke R<sup>2</sup>: 0.113.*

259 *Significant p-values are indicated in bold.*

260

261 **Developing the risk score**

262 The odds ratios of the variables that were individually associated with possibly medication-related  
 263 readmission were used for assigning points to each of the included variables. Hence, since the odds  
 264 ratio for *Emergency admission* was about double the size of the other included variables, *Emergency*  
 265 *admission* was assigned two points whereas the other variables were assigned one point each, giving  
 266 a maximum score of six points. The resultant 0 to 6 point risk score, shown in Figure 1, was named  
 267 the Hospitalisations, Own home, Medications, and Emergency admission (HOME) Score.

268 The model showed fair calibration with a Hosmer and Lemeshow goodness of fit p-value of 1.000  
 269 and Nagelkerke R<sup>2</sup> of 0.117. The calculated area under the risk score ROC-curve (c-index) was 0.69  
 270 (95%CI 0.64-0.74).

271

272 **FIGURE 1 – the HOME Score**

273

274 Youden's index was calculated for each step in the risk score using the coordinates in the ROC-curve  
 275 (Table 2). A suitable threshold value would be where Youden's Index is closest to 1, in this case at a  
 276 score of 4 or 5.

277

278 **Table 2. Youden's Index calculated for each step in the risk score in order to find a suitable**  
 279 **threshold value**

| Score | Sensitivity | 1-Specificity | Specificity | Youden's Index |
|-------|-------------|---------------|-------------|----------------|
|-------|-------------|---------------|-------------|----------------|

|   |       |       |       |       |
|---|-------|-------|-------|-------|
| 0 | 1.000 | 1.000 | 0.000 | 0.000 |
| 1 | 1.000 | 0.974 | 0.026 | 0.026 |
| 2 | 0.951 | 0.827 | 0.173 | 0.124 |
| 3 | 0.937 | 0.794 | 0.206 | 0.143 |
| 4 | 0.755 | 0.466 | 0.534 | 0.289 |
| 5 | 0.413 | 0.170 | 0.830 | 0.243 |
| 6 | 0.147 | 0.055 | 0.945 | 0.092 |

280

281 A threshold score of  $\geq 4$  points was finally chosen as the threshold score. The choice was based on  
 282 the desire to identify as many patients at increased risk of possibly medication-related readmission  
 283 as possible, i.e. sensitivity rather than specificity should be as high as possible. At the threshold score  
 284 ( $\geq 4$  points) sensitivity was 76%, specificity 53%, positive predictive value 29%, and negative  
 285 predictive value 90% (Table 3). The number of correctly predicted patients was 108 (out of 143).

286

287 **Table 3. Diagnostic testing of the HOME Score in the development and validation cohorts**

|                                                | Development<br>cohort | Validation<br>cohort |
|------------------------------------------------|-----------------------|----------------------|
| Sample size                                    | 720                   | 892                  |
| Readmission within 30 days of discharge, n (%) | 360 (50)              | 132 (15)             |
| Possibly medication-related readmission, n (%) | 143 (40)              | 54 (41)              |
| Unlikely medication-related readmission, n (%) | 217 (60)              | 78 (59)              |
| Area under ROC-curve (standard error)          | 0.69 (0.02)           | 0.65 (0.04)          |
| 95% confidence interval                        | 0.64-0.74             | 0.57-0.72            |
| Patient distribution                           |                       |                      |



|                                                       |          |          |
|-------------------------------------------------------|----------|----------|
| HOME Score <4, n (%)                                  | 343 (48) | 443 (50) |
| HOME Score $\geq$ 4, n (%)                            | 377 (52) | 447 (50) |
| Patients with possibly medication-related readmission |          |          |
| HOME Score <4, n (%)                                  | 35 (10)  | 20 (5)   |
| HOME Score $\geq$ 4, n (%)                            | 108 (29) | 34 (8)   |
| At HOME Score $\geq$ 4:                               |          |          |
| Sensitivity, %                                        | 76       | 63       |
| Specificity, %                                        | 53       | 51       |
| Positive predictive value, %                          | 29       | 8        |
| Negative predictive value, %                          | 90       | 96       |
| Number of correctly predicted patients, n             | 108      | 34       |
| At HOME Score $\geq$ 5                                |          |          |
| Sensitivity, %                                        | 41       | 43       |
| Specificity, %                                        | 83       | 80       |
| Positive predictive value, %                          | 38       | 12       |
| Negative predictive value, %                          | 85       | 96       |
| Number of correctly predicted patients, n             | 59       | 23       |

288

289

## 290 External validation of the risk assessment tool

291 In the validation cohort only the variable *Hospitalisations within the last 12 months  $\geq$ 2* was shown to  
 292 be individually associated with possibly medication-related readmission (Table 4).

293 Logistic regression analysis in the validation cohort, with *Possibly medication-related readmission* as  
 294 the dependent variable and *HOME score* as the test variable, showed fair calibration with a Hosmer  
 295 and Lemeshow goodness of fit p-value of 1.000 and Nagelkerke R<sup>2</sup> of 0.051.

296

297 **Table 4. Comparison<sup>a</sup> of variables between groups in the development and validation cohort**

| Predictor                                              | Development cohort |                                             |                  | Validation cohort |                                             |              |
|--------------------------------------------------------|--------------------|---------------------------------------------|------------------|-------------------|---------------------------------------------|--------------|
|                                                        | PMRR<br>(n=143)    | Comparison<br>group <sup>b</sup><br>(n=577) | p-value          | PMRR<br>(n=54)    | Comparison<br>group <sup>b</sup><br>(n=838) | p-value      |
| Hospitalisations within the last 12 months $\geq$ 2, % | 52                 | 36                                          | <b>&lt;0.001</b> | 30                | 17                                          | <b>0.018</b> |
| Living in own home, with home care, %                  | 37                 | 18                                          | <b>&lt;0.001</b> | 35                | 24                                          | 0.058        |
| Living in own home, alone, %                           | 53                 | 37                                          | <b>&lt;0.001</b> | 54                | 45                                          | 0.213        |
| Number of medications at admission $\geq$ 5, %         | 87                 | 71                                          | <b>&lt;0.001</b> | 91                | 81                                          | 0.077        |
| Emergency admission, %                                 | 97                 | 89                                          | <b>0.002</b>     | 100               | 96                                          | 0.150        |

298 *Abbreviations: PMRR – Possibly Medication-Related Readmission*299 *<sup>a</sup>A  $\chi^2$ -test was used for analysis in all cases, <sup>b</sup>Comparison group = Patients not readmitted and  
300 patients with an unlikely medication-related readmission*301 *Significant p-values ( $p < 0.05$ ) are indicated in bold.*

302

303 The c-index of the HOME Score was 0.65 (CI95% 0.57-0.72, p-value &lt; 0.001) in the validation cohort.

304 The risk score, with the cut-off point set at  $\geq$ 4 points, showed a nonsignificant difference between  
305 groups (p-value 0.051). At this threshold score ( $\geq$ 4) sensitivity was 63%, specificity 51%, positive

306 predictive value 8%, and negative predictive value 96% (Table 3). The number of correctly predicted

1  
2  
3 307 patients was 34 (out of 54). With the cut-off point set at  $\geq 5$  points there was a significant difference  
4  
5 308 between groups (p value  $< 0.001$ ). Sensitivity was 43%, specificity 80%, positive predictive value 12%  
6  
7 309 and negative predictive value 96%. The number of correctly predicted patients was 23 (out of 54)  
8  
9  
10 310 (Table 3).  
11  
12

13 311

## 16 312 **DISCUSSION**

18  
19  
20 313 The risk assessment tool developed in this study, the HOME Score, is the first externally validated  
21  
22 314 risk assessment tool that can be used to identify older adults ( $\geq 65$  years) at increased risk of possibly  
23  
24 315 medication-related readmission to hospital within 30 days of discharge. The HOME Score was fairly  
25  
26 316 discriminative of possibly medication-related readmission and showed fair calibration in  
27  
28 317 development as well as in external validation. The tool is easy to use and includes variables that  
29  
30 318 should be readily available in the electronic health records at admission, thus making it possible to  
31  
32 319 implement risk-reducing activities during the hospital stay as well as at discharge and in transitions  
33  
34 320 of care.  
35  
36  
37  
38

### 40 321 **Comparisons to other studies**

41  
42  
43 322 There have not yet, to our knowledge, been any risk assessment tools developed that are directly  
44  
45 323 comparable to the HOME Score. However, there are several tools that can be used to identify  
46  
47 324 patients at increased risk of all-cause readmission to hospital within 30 days of discharge, such as the  
48  
49 325 HOSPITAL Score (27), the LACE Index (28), and the PAR-Risk Score (29). Even though the PAR-Risk  
50  
51 326 Score focuses on medications as a risk factor for potentially avoidable hospital readmissions, it does  
52  
53 327 not specifically predict medication-related readmissions. There are, however, a few risk assessment  
54  
55 328 tools related to medication-related healthcare use after discharge, such as the PRIME tool (16) and  
56  
57  
58  
59  
60

1  
2  
3 329 the decision support tool developed by Olson et al (17). None of the above-mentioned tools solely  
4  
5 330 includes factors that are known already at admission as does the HOME Score.  
6  
7

8 331 The PRIME tool, developed by Parekh et al (16), identifies older patients ( $\geq 65$  years) at increased risk  
9  
10 332 of medication-related harm requiring healthcare use within eight weeks of discharge from hospital.  
11

12 333 The tool was derived in a multicentre, prospective cohort study in the UK. In total 818 patients  
13  
14 334 discharged from five UK teaching hospitals between 2013 and 2015 were included. The PRIME tool  
15  
16 335 was internally validated using bootstrapping and the c-index was 0.69 before and 0.66 after  
17  
18 336 validation. Hence, compared to the PRIME tool, the HOME Score has a similar predictive ability with  
19  
20 337 a c-index of 0.69 in the development cohort and 0.65 in the validation cohort.  
21  
22

23  
24 338 With the PRIME tool (16) healthcare use after discharge includes not only hospital readmissions but  
25  
26 339 also other healthcare use such as visits to the emergency department, in-person or telephone  
27  
28 340 consultations with a general practitioner, or visits to outpatient clinics. This means that the PRIME  
29  
30 341 tool predicts healthcare use in broader sense than does the HOME Score. Further, medication-  
31  
32 342 related harm in the PRIME tool is defined as adverse drug reactions and harm arising from non-  
33  
34 343 adherence only while the HOME Score defines medication-related problems more broadly, also  
35  
36 344 including problems such as inappropriate prescribing and problems related to over-the-counter  
37  
38 345 medications (see Appendix 1) (23).  
39  
40  
41  
42

#### 43 346 **Variables included in the model**

44  
45  
46 347 The variables included in the HOME Score were identified in our previous studies (10, 22) where we  
47  
48 348 identified risk factors for all-cause readmission, possibly medication-related readmission, and  
49  
50 349 unlikely medication-related readmission within 30 days of discharge, in patients 65 years and older.  
51  
52

53 350 We chose to solely include variables known already at admission since research suggests that the  
54  
55 351 successful reduction of possibly medication-related readmission demands the implementation of  
56  
57 352 actions during the hospital stay (30) as well as at discharge (12) and in transitions of care (14). In  
58  
59 353 order to do this, patients at increased risk of possibly medication-related readmission need to be  
60

1  
2  
3 354 identified already at admission. Hence, the HOME Score has an advantage compared to previously  
4  
5 355 developed tools such as the PRIME tool (16), which include factors not known until discharge.  
6  
7

### 8 356 Hospitalisations within the last 12 months $\geq 2$

9  
10  
11 357 The number of previous hospitalisations is a measure of disease burden and the fact that readmitted  
12  
13 358 patients are more ill does not really come as a surprise since this has been shown previously (2, 22,  
14  
15 359 28). In a Swedish study from 2022, Naseer et al (31) showed that emergency department visits in  
16  
17 360 older adults are significantly associated with several variables indicating disease burden, such as  
18  
19 361 number of chronic diseases, number of primary care visits, number of emergency department visits,  
20  
21 362 polypharmacy, and receipt of home care.  
22  
23

24  
25 363 Naseer et al (32) have also shown that prior healthcare use is associated with emergency  
26  
27 364 department revisits within 30 days, in older adults. Similarly, we have identified previous healthcare  
28  
29 365 use as a risk factor of possibly medication-related readmissions within 30 days of discharge (10)  
30  
31 366 which is why this factor was included in the HOME Score. Prior healthcare use has also been  
32  
33 367 indicated as a risk factor for all-cause readmission (22, 27, 28) and the factor is included, in some  
34  
35 368 form, in the HOSPITAL Score (27), the LACE Index (28), and the PAR-Risk Score (29).  
36  
37  
38  
39

### 40 369 Living in own home with home care and/or alone

41  
42  
43 370 Living in your own home alone is included as a variable in the HOME Score as well as in the PRIME  
44  
45 371 tool (16). Living arrangements have been previously indicated as risk factors for readmission in  
46  
47 372 several studies. In 2016 Olson et al (33) identified an increased risk of readmission in older men  
48  
49 373 living in their own home with only their adult children as caregivers. Further, Gruneir et al (34) have  
50  
51 374 shown that patients using high-risk medications have an 80% increased risk of readmission within 30  
52  
53 375 days if discharged to their own home as opposed to a nursing home. However, Naseer et al (32) did  
54  
55 376 not find living alone to be explanatory of emergency department revisits in older adults. They did, on  
56  
57 377 the other hand, find the receipt of home care to be significantly associated with emergency  
58  
59  
60

1  
2  
3 378 department revisits in one of the two Swedish regions studied. Similarly, Dahlberg et al (35) have  
4  
5 379 shown that living at home with home care is significantly associated with unplanned (emergency)  
6  
7 380 admission to hospital.

8  
9  
10 381 When it comes to readmission to hospital, we have previously shown that living in the community  
11  
12 382 with home care is a risk factor for all-cause readmission (22) and in this study further analyses  
13  
14 383 showed that it is also associated with possibly medication-related readmission. This factor is not, to  
15  
16 384 our knowledge, found in other assessment tools aiming to identify all-cause readmission or possibly  
17  
18 385 medication-related readmission. However, it is part of several comprehensive geriatric assessment  
19  
20 386 tools aiming to identify vulnerability and frailty (36-38). Such comprehensive geriatric assessment  
21  
22 387 tools have also been shown to be predictive of all-cause readmission to hospital within 30 days (36)  
23  
24 388 and 60 days (37) of discharge, in older adults.

#### 25 26 27 28 29 389 **Number of medications at admission $\geq 5$**

30  
31  
32 390 Polypharmacy is a commonly indicated risk factor for medication-related problems in older adults  
33  
34 391 (39). Polypharmacy, in itself, is not necessarily a bad thing but with age comes physiological changes  
35  
36 392 that affect the pharmacokinetics and pharmacodynamics of medications. This leads to increased  
37  
38 393 sensitivity (39, 40) which, in turn, leads to an increased risk of medication-related problems (39). The  
39  
40 394 presence of polypharmacy (32, 41, 42) and medication-related problems (8, 43) can lead to  
41  
42 395 increased healthcare use and, as shown in this study, to possibly medication-related readmissions.  
43  
44 396 Hence, polypharmacy was included in the HOME Score. Similarly, the number of medications used is  
45  
46 397 included as a risk factor in the PRIME tool (16) as well as in the decision support tool predicting  
47  
48 398 elderly patients' risk of readmission based on their high-risk medication regimens, developed by  
49  
50 399 Olson et al (17).

51  
52  
53  
54  
55  
56  
57  
58  
59  
60

## 400 Emergency admission

401 Emergency admission, as opposed to planned admission, has been indicated as a risk factor for 30-  
402 day readmission in several studies, including ours (10, 22), and the factor is included in both the  
403 HOSPITAL Score (27) and the LACE Index (28).

404 In the study by Dahlberg et al (35) the only social factor significantly associated with unplanned  
405 hospital admission was living at home with home care. Furthermore, in our previous study, we  
406 showed that older adults with a possibly medication-related readmission who lived alone were more  
407 often readmitted due to an unsustainable home situation than those living with someone (10). Since  
408 living with home care and living alone are also indicated as risk factors for all-cause and possibly  
409 medication-related readmissions, this indicates that these readmitted older adults need closer  
410 supervision after discharge. At the very least they need better planning before discharge. To achieve  
411 this, the collaboration between hospital, primary, and municipal care needs to improve (12, 14).

## 412 Implications for clinical use

413 Healthcare involving multimorbid older adults is complex and integrating care across disciplines, as  
414 well as working together in interdisciplinary teams, is important to achieve safe and effective  
415 healthcare (11, 12, 14, 44). Improving medication use as well as transitions of care has been shown  
416 to be important factors when aiming to reduce the frequency of medication-related readmissions  
417 (11, 12). Including clinical pharmacists in the interdisciplinary team, to help with medication  
418 reconciliation and medication review as well as information transfer and follow-up regarding  
419 medications and medication changes, can support this (12, 45-47). The HOME Score can be used to  
420 find the patients in most need of this support.

421 Even though the positive predictive value of the HOME score is quite low (29% in the development  
422 cohort and 8% in the validation cohort), it could be useful in clinical practice, especially considering  
423 the negative predictive value. Among the 50% of older adults identified as at low risk of medication-

1  
2  
3 424 related readmission, 90% of patients in the development cohort and 96% in the validation cohort  
4  
5 425 were indeed not readmitted due to medication-related problems. Hence, using the HOME Score,  
6  
7 426 healthcare personnel can easily rule out 50% of patients 65 years and older who are not at increased  
8  
9 427 risk of medication-related readmission. This can be done already at admission to hospital, and in  
10  
11 428 doing so, the efficiency and effectiveness of preventive actions aiming to improve medication use  
12  
13 429 and transitions of care can probably improve. This can possibly, in turn, lead to an increase in patient  
14  
15 430 safety as well as benefits to the health economy. Further studies are needed to test these  
16  
17 431 hypotheses.  
18  
19  
20  
21

## 22 432 **Strengths and limitations**

23  
24  
25 433 According to the TRIPOD statement (15) an internal validation should always be performed when  
26  
27 434 developing a prediction model, which was not done in this study. This choice was based on the fact  
28  
29 435 that an external validation, using a geographically separate population, was performed. We  
30  
31 436 considered this to be sufficient as clinical prediction models are always in need of further validation  
32  
33 437 studies, as performance differs between locations, settings, and over time (48). Hence, this is just a  
34  
35 438 first edition of the HOME Score and further studies are needed to test its clinical usefulness and to  
36  
37 439 keep it up-to-date.  
38  
39  
40

41 440 The HOME Score was developed using data from a retrospective study performed in a population  
42  
43 441 admitted to a single Swedish hospital. This could limit its generalisability, which is why an external  
44  
45 442 validation was carried out using data from four other hospitals in another part of Sweden. The tool's  
46  
47 443 predictive ability was withstanding, suggesting that it can be used when aiming to identify patients  
48  
49 444 at increased risk of possibly medication-related readmission in Sweden. However, further studies are  
50  
51 445 needed to assess the international validity of the HOME Score as well as its validity in other  
52  
53 446 populations within Sweden. As stated previously, this is merely a first edition of the HOME Score and  
54  
55 447 further studies are needed to test its clinical usefulness and to keep it updated.  
56  
57  
58  
59  
60



1  
2  
3 448 We chose to include the categorical variable *Number of medications at admission*  $\geq 5$  in the final risk  
4  
5 449 score even though the mean number of medications was 10.30 in patients with a possibly  
6  
7 450 medication-related readmission and 8.09 in the comparison group. This choice was based on the  
8  
9  
10 451 Swedish directives and general advice (20) stating that a medication reconciliation should be  
11  
12 452 performed in admitted patients taking 5 medications or more, but it may have weakened the  
13  
14 453 prediction model. This is one of the aspects that should be examined when further validating the  
15  
16 454 HOME Score and investigating its clinical usefulness.

17  
18  
19  
20 455 The population used in developing the HOME Score was tailored for the identification of risk factors  
21  
22 456 for all-cause readmission and possibly medication-related readmission (10, 22). This led to a larger  
23  
24 457 proportion of readmitted patients in the development cohort (50%) compared to the proportion in  
25  
26 458 the validation cohort (15%), the proportion of 30-day readmissions in the validation cohort being  
27  
28 459 closer to that reported in previous studies (1-3). This could be considered a weakness.

29  
30  
31  
32 460 The tool AT-HARM10 (23) was used by clinical pharmacists in both the development (10) and  
33  
34 461 validation cohort (25, 26) in order to assess whether 30-day readmissions were possibly or unlikely  
35  
36 462 medication-related. This is a strength as the same definition of medication-related readmission was  
37  
38 463 used in both populations. However, even though the tool has been validated (23), the assessments  
39  
40 464 are implicit, and the result depends on the person conducting them. This could be considered a  
41  
42 465 weakness. The fact that the amount of possibly medication-related readmissions was almost the  
43  
44 466 same in the development and validation cohort (40% in the development cohort and 41% in the  
45  
46 467 validation cohort) indicates that this may not be a big issue.

47  
48  
49  
50  
51 468 In the development cohort, included patients were admitted to medical as well as surgical  
52  
53 469 departments whereas patients in the validation cohort were admitted solely to medical wards. This  
54  
55 470 could have affected the results and further validations of the HOME Score are needed in order to  
56  
57 471 establish its clinical usefulness in different departments as well as in other countries.  
58  
59  
60

1  
2  
3 472  
4  
5  
67 473 **CONCLUSION**

8  
9  
10 474 The HOME Score can be used to identify older adults at increased risk of possibly medication-related  
11  
12 475 readmission within 30 days of discharge. The tool is easy to use and includes variables that should be  
13  
14 476 readily available in electronic health records at admission, thus making it possible to implement risk-  
15  
16 477 reducing activities during the hospital stay as well as at discharge and in transitions of care. These  
17  
18 478 activities could possibly help increase patient safety as well as be beneficial to the health economy  
19  
20 479 but further studies are needed to investigate the clinical usefulness of the HOME Score as well as the  
21  
22 480 benefits of implemented activities.  
23  
24  
25

26 481  
27  
28  
2930 482 **ACKNOWLEDGEMENTS**

31  
32  
33 483 We want to thank Patrick O'Reilly for his expertise and advice in editing the manuscript.  
34  
35 484 Furthermore, we want to thank Anton Hedman for fast and reliable help with extracting data from  
36  
37 485 the MedBridge trial database.  
38  
39 486 This study was accomplished within the context of the Swedish National Graduate School on Ageing  
40  
41 487 and Health (SWEAH).  
42  
43  
44

45 488  
46  
47  
48  
4950 489 **STATEMENTS**51  
52  
53 490 **Competing interests**

54  
55  
56 491 The authors declare that they have no competing interests.  
57  
58  
59  
60

## 492 **Author contributions**

493 All authors have contributed to the design of this study. MG collected, interpreted, and analysed the  
494 data with the support of the other authors. The first draft of the manuscript was completed by MG  
495 after which it was critically read and commented on by the other authors. All authors have read and  
496 approved the final manuscript.

## 497 **Funding**

498 This study was supported by a grant from the ALF funding from Region Skåne, awarded to PM. The  
499 study was further supported by doctoral grants from the Research and Development Committee at  
500 Kristianstad-Hässleholm Hospitals and the Southern Medical Care Region, awarded to MG. The  
501 funding body had no role in the design of the study, the collection, analysis, or interpretation of data  
502 or in writing the manuscript.

## 503 **Ethics statement**

504 Ethical approval was applied for and approved by the Swedish Ethics Review Authority (Dnr 2021-  
505 06612-01).

## 506 **Data Availability Statement**

507 In accordance with the Public Access to Information and Secrecy Act (49) Swedish Authorities restrict  
508 public access to the datasets analysed during the current study. However, data can be made available  
509 for research after a special review including approval of the research project by an ethics committee  
510 as well as the authorities' data safety committees. Queries regarding data access are referred to the  
511 corresponding author.

512

## 513 FIGURE LEGEND

514 **Figure 1:** The HOME Score to be used at admission to hospital in order to identify older adults at  
515 increased risk of possibly medication-related readmission within 30 days of discharge.  
516 Hospitalisations within the last 12 months and living in own home, alone and/or with home care,  
517 refer to events and conditions prior to the admission in question.

## 519 SUPPORTING INFORMATION

520 **Appendix 1. Assessment Tool for identifying Hospital Admissions Related to Medicine (AT-  
521 HARM10).** Includes the AT-HARM10 assessment tool, instructions for use and representative  
522 examples of when a question should be answered "Yes" or "No".

## 524 REFERENCES

- 525 1. Swedish Association of Local Authorities and Regions. Health care in numbers  
526 [Internet]. Swedish Association of Local Authorities and Regions; 2022 [Available  
527 from: <https://www.vardenisiffror.se>]. Access date: 19 August 2022. Language:  
528 Swedish
- 529 2. Pedersen MK, Meyer G, Uhrenfeldt L. Risk factors for acute care hospital readmission  
530 in older persons in Western countries: a systematic review. *JBI database System Rev  
531 Implement Rep.* 2017;15(2):454-85.
- 532 3. Bailey MK, Weiss AJ, Barrett ML, et al. Characteristics of 30-Day All-Cause Hospital  
533 Readmissions, 2010–2016. 2019 Feb 12. In: Healthcare Cost and Utilization Project

- 1  
2  
3 534 (HCUP) Statistical Briefs [Internet]. Rockville (MD): Agency for Healthcare Research  
4  
5 535 and Quality (US); 2006 Feb. Statistical Brief #248. PMID: 30896914  
6  
7 536 4. Mudge AM, McRae P, Hubbard RE, et al. Hospital-Associated Complications of Older  
8  
9 537 People: A Proposed Multicomponent Outcome for Acute Care. *J Am Geriatr Soc.*  
10  
11 538 2019;67(2):352-6.  
12  
13 539 5. Creditor MC. Hazards of hospitalization of the elderly. *Ann Intern Med.*  
14  
15 540 1993;118(3):219-23.  
16  
17 541 6. Kristensen SR, Bech M, Quentin W. A roadmap for comparing readmission policies  
18  
19 542 with application to Denmark, England, Germany and the United States. *Health Policy.*  
20  
21 543 2015;119(3):264-73.  
22  
23 544 7. Swedish Association of Local Authorities and Regions. Indicators for consistent health  
24  
25 545 and social care. 2018. Available from:  
26  
27 546 [<https://skr.se/download/18.42336a32177c8ab158d3fd70/1615301657651/Indikatorer%20fo%CC%88r%20sammanha%CC%8Allen%20va%CC%8Ard%20-%20en%20va%CC%88gledning.pdf>]. Access date: 14 November 2022. Language:  
28  
29 547 Swedish  
30  
31 548  
32  
33 549  
34  
35 550 8. El Morabet N, Uitvlugt EB, van den Bemt BJJ, et al. Prevalence and Preventability of  
36  
37 551 Drug-Related Hospital Readmissions: A Systematic Review. *J Am Geriatr Soc.*  
38  
39 552 2018;66(3):602-8.  
40  
41 553 9. Linkens A, Milosevic V, van der Kuy PHM, et al. Medication-related hospital  
42  
43 554 admissions and readmissions in older patients: an overview of literature. *Int J Clin*  
44  
45 555 *Pharm.* 2020;42(5):1243-51.  
46  
47 556 10. Glans M, Kragh Ekstam A, Jakobsson U, et al. Medication-related hospital  
48  
49 557 readmissions within 30 days of discharge-A retrospective study of risk factors in older  
50  
51 558 adults. *PLoS One.* 2021;16(6):e0253024.  
52  
53  
54  
55  
56  
57  
58  
59  
60

- 1  
2  
3 559 11. Auerbach AD, Kripalani S, Vasilevskis EE, et al. Preventability and Causes of  
4  
5 560 Readmissions in a National Cohort of General Medicine Patients. *JAMA Intern Med.*  
6  
7 561 2016;176(4):484-93.  
8  
9  
10 562 12. Uitvlugt EB, Janssen MJA, Siegert CEH, et al. Medication-Related Hospital  
11  
12 563 Readmissions Within 30 Days of Discharge: Prevalence, Preventability, Type of  
13  
14 564 Medication Errors and Risk Factors. *Front Pharmacol.* 2021;12:567424.  
15  
16 565 13. Hesselink G, Schoonhoven L, Barach P, et al. Improving patient handovers from  
17  
18 566 hospital to primary care: a systematic review. *Ann Intern Med.* 2012;157(6):417-28.  
19  
20 567 14. Blachman NL, Blaum CS. Integrating Care Across Disciplines. *Clin Geriatr Med.*  
21  
22 568 2016;32(2):373-83.  
23  
24  
25 569 15. Collins GS, Reitsma JB, Altman DG, et al. Transparent reporting of a multivariable  
26  
27 570 prediction model for individual prognosis or diagnosis (TRIPOD): the TRIPOD  
28  
29 571 statement. *BMJ.* 2015;350:g7594.  
30  
31  
32 572 16. Parekh N, Ali K, Davies JG, et al. Medication-related harm in older adults following  
33  
34 573 hospital discharge: development and validation of a prediction tool. *BMJ Qual Saf.*  
35  
36 574 2020;29(2):142-53.  
37  
38  
39 575 17. Olson CH, Dierich M, Adam T, et al. Optimization of decision support tool using  
40  
41 576 medication regimens to assess rehospitalization risks. *Appl Clin Inform.* 2014;5(3):773-  
42  
43 577 88.  
44  
45 578 18. Swedish Association of Local Authorities and Regions. Municipalities and regions 2022  
46  
47 579 [Available from: <https://skr.se/skr/englishpages/municipalitiesandregions.1088.html>].  
48  
49 580 Access date: 14 November 2022. Language: Swedish  
50  
51  
52 581 19. Swedish Government Offices. Law (2017:612) on collaboration at discharge from  
53  
54 582 hospital healthcare. 2018. [Available from: <https://www.riksdagen.se/sv/dokument-lagar/dokument/svensk-forfattningssamling/lag-2017612-om-samverkan-vid-utskrivning-fran-sfs-2017-612>]. Access date: 14 November 2022. Language: Swedish  
55  
56  
57  
58  
59  
60

- 1  
2  
3 585 20. Swedish National Board of Health and Welfare. Directives and general advice (HSLF-FS  
4  
5 586 2017:37) on prescription and handling of medicines in health care. Swedish National  
6  
7 587 Board of Health and Welfare; 2017. [Available from  
8  
9  
10 588 13  
14 590 21. Swedish National Board of Health and Welfare. Medication Reviews - A Follow-up and  
15  
16 591 Evaluation of the National Board of Health and Welfare's Regulations About  
17  
18 592 Medication Reviews in Chapter 11. HSLF-FS 2017:37. 2019. [Available from:  
19  
20 593 23  
24 595 [29](https://www.socialstyrelsen.se/globalassets/sharepoint-<br/>25<br/>26 596 22. Glans M, Kragh Ekstam A, Jakobsson U, et al. Risk factors for hospital readmission in<br/>27<br/>28 597 older adults within 30 days of discharge - a comparative retrospective study. <i>BMC<br/>29<br/>30 598 Geriatr.</i> 2020;20(1):467.<br/>31<br/>32<br/>33 599 23. Kempen TGH, Hedstrom M, Olsson H, et al. Assessment tool for hospital admissions<br/>34<br/>35 600 related to medications: development and validation in older patients. <i>Int J Clin Pharm.</i><br/>36<br/>37 601 2019;41(1):198-206.<br/>38<br/>39<br/>40 602 24. Strand LM, Morley PC, Cipolle RJ, et al. Drug-related problems: their structure and<br/>41<br/>42 603 function. <i>Diap.</i> 1990;24(11):1093-7.<br/>43<br/>44<br/>45 604 25. Kempen TGH, Bertilsson M, Hadziosmanovic N, et al. Effects of Hospital-Based<br/>46<br/>47 605 Comprehensive Medication Reviews Including Postdischarge Follow-up on Older<br/>48<br/>49 606 Patients' Use of Health Care: A Cluster Randomized Clinical Trial. <i>JAMA Netw Open.</i><br/>50<br/>51 607 2021;4(4):e216303.<br/>52<br/>53<br/>54 608 26. Kempen TGH, Bertilsson M, Lindner KJ, et al. Medication Reviews Bridging Healthcare<br/>55<br/>56 609 (MedBridge): Study protocol for a pragmatic cluster-randomised crossover trial.<br/>57<br/>58 610 <i>Contemp Clin Trials.</i> 2017;61:126-32.<br/>59<br/>60</p></div><div data-bbox=)

- 1  
2  
3 611 27. Donze J, Aujesky D, Williams D, et al. Potentially avoidable 30-day hospital  
4  
5 612 readmissions in medical patients: derivation and validation of a prediction model.  
6  
7 613 *JAMA Intern Med.* 2013;173(8):632-8.  
8  
9  
10 614 28. van Walraven C, Dhalla IA, Bell C, et al. Derivation and validation of an index to predict  
11  
12 615 early death or unplanned readmission after discharge from hospital to the  
13  
14 616 community. *CMAJ.* 2010;182(6):551-7.  
15  
16 617 29. Blanc AL, Fumeaux T, Stirnemann J, et al. Development of a predictive score for  
17  
18 618 potentially avoidable hospital readmissions for general internal medicine patients.  
19  
20 619 *PLoS One.* 2019;14(7):e0219348.  
21  
22  
23 620 30. Gustafsson M, Sjolander M, Pfister B, et al. Pharmacist participation in hospital ward  
24  
25 621 teams and hospital readmission rates among people with dementia: a randomized  
26  
27 622 controlled trial. *Eur J Clin Pharmacol.* 2017;73(7):827-35.  
28  
29  
30 623 31. Naseer M, McKee JM, Ehrenberg A, et al. Individual and contextual predictors of  
31  
32 624 emergency department visits among community-living older adults: a register-based  
33  
34 625 prospective cohort study. *BMJ Open.* 2022;12(2):e055484.  
35  
36  
37 626 32. Naseer M, Agerholm J, Fastbom J, et al. Factors associated with emergency  
38  
39 627 department revisits among older adults in two Swedish regions: A prospective cohort  
40  
41 628 study. *Arch Gerontol Geriatr.* 2020;86:103960.  
42  
43  
44 629 33. Olson CH, Dey S, Kumar V, et al. Clustering of elderly patient subgroups to identify  
45  
46 630 medication-related readmission risks. *Int J Med Inform.* 2016;85(1):43-52.  
47  
48 631 34. Gruneir A, Fung K, Fischer HD, et al. Care setting and 30-day hospital readmissions  
49  
50 632 among older adults: a population-based cohort study. *CMAJ.* 2018;190(38):E1124-  
51  
52 633 e33.  
53  
54 634 35. Dahlberg L, Agahi N, Schön P, et al. Planned and Unplanned Hospital Admissions and  
55  
56 635 Their Relationship with Social Factors: Findings from a National, Prospective Study of  
57  
58 636 People Aged 76 Years or Older. *Health Serv Res.* 2018;53(6):4248-67.  
59  
60



- 1  
2  
3 637 36. Gregersen M, Hansen TK, Jørgensen BB, et al. Frailty is associated with hospital  
4  
5 638 readmission in geriatric patients: a prognostic study. *Eur Geriatr Med.* 2020;11(5):783-  
6  
7 639 92.  
8  
9  
10 640 37. Stillman GR, Stillman AN, Beecher MS. Frailty Is Associated With Early Hospital  
11  
12 641 Readmission in Older Medical Patients. *J Appl Gerontol.* 2021;40(1):38-46.  
13  
14 642 38. Sternberg SA, Wershof Schwartz A, Karunanathan S, et al. The identification of  
15  
16 643 frailty: a systematic literature review. *J Am Geriatr Soc.* 2011;59(11):2129-38.  
17  
18  
19 644 39. Kim J, Parish AL. Polypharmacy and Medication Management in Older Adults. *Nurs*  
20  
21 645 *Clin North Am.* 2017;52(3):457-68.  
22  
23 646 40. Corsonello A, Pedone C, Incalzi RA. Age-related pharmacokinetic and  
24  
25 647 pharmacodynamic changes and related risk of adverse drug reactions. *Curr Med*  
26  
27 648 *Chem.* 2010;17(6):571-84.  
28  
29  
30 649 41. Picker D, Heard K, Bailey TC, et al. The number of discharge medications predicts  
31  
32 650 thirty-day hospital readmission: a cohort study. *BMC Health Serv Res.* 2015;15:282.  
33  
34 651 42. Basnet S, Zhang M, Lesser M, et al. Thirty-day hospital readmission rate amongst older  
35  
36 652 adults correlates with an increased number of medications, but not with Beers  
37  
38 653 medications. *Geriatr Gerontol Int.* 2018;18(10):1513-8.  
39  
40  
41 654 43. Ekerstad N, Bylin K, Karlson BW. Early rehospitalizations of frail elderly patients - the  
42  
43 655 role of medications: a clinical, prospective, observational trial. *Drug Healthc Patient*  
44  
45 656 *Saf.* 2017;9:77-88.  
46  
47  
48 657 44. Ekdahl AW. How to promote better care of elderly patients with multi-morbidity in  
49  
50 658 Europe: A Swedish example. *Eur Geriatr Med.* 2012;3(2):103-6.  
51  
52 659 45. Daliri S, Hugtenburg JG, Ter Riet G, et al. The effect of a pharmacy-led transitional care  
53  
54 660 program on medication-related problems post-discharge: A before-After prospective  
55  
56 661 study. *PLoS One.* 2019;14(3):e0213593.  
57  
58  
59  
60

- 1  
2  
3 662 46. Kripalani S, Jackson AT, Schnipper JL, et al. Promoting effective transitions of care at  
4  
5 663 hospital discharge: a review of key issues for hospitalists. *J Hosp Med*. 2007;2(5):314-  
6  
7 664 23.  
8  
9  
10 665 47. Glans M, Midlöv P, Kragh Ekstam A, et al. Obstacles and Opportunities in Information  
11  
12 666 Transfer Regarding Medications at Discharge - A Focus Group Study with Hospital  
13  
14 667 Physicians. *Drug Healthc Patient Saf*. 2022;14:61-73.  
15  
16 668 48. Van Calster B, Steyerberg EW, Wynants L, et al. There is no such thing as a validated  
17  
18 669 prediction model. *BMC Med*. 2023;21(1):70.  
19  
20  
21 670 49. Government Offices of Sweden. The Public Access to Information and Secrecy Act.  
22  
23 671 2009. [Available from: [https://www.government.se/information-  
26  
27 673 material/2009/09/public-access-to-information-and-secrecy-act/](https://www.government.se/information-<br/>24<br/>25 672 material/2009/09/public-access-to-information-and-secrecy-act/)]. Access date: 14  
28  
29  
30  
31  
32  
33  
34  
35  
36  
37  
38  
39  
40  
41  
42  
43  
44  
45  
46  
47  
48  
49  
50  
51  
52  
53  
54  
55  
56  
57  
58  
59  
60

## The HOME Score

*Clinical risk score for predicting possibly medication-related readmission within 30 days of discharge - in patients 65 years and older*

|                                                    |                                                     | Points |
|----------------------------------------------------|-----------------------------------------------------|--------|
| <b>Hospitalisations</b>                            | Hospitalisations within the last 12 months $\geq 2$ | 1      |
| <b>Own home</b>                                    | Living in own home, with home care                  | 1      |
|                                                    | Living in own home, alone                           | 1      |
| <b>Medications</b>                                 | Number of medications at admission $\geq 5$         | 1      |
| <b>Emergency admission</b>                         | Emergency admission (as opposed to planned)         | 2      |
| <b>Total</b>                                       |                                                     |        |
| <i>A score of 4 or more denotes increased risk</i> |                                                     |        |

# AT-HARM10 – Instructions

## Assessment Tool for identifying Hospital Admissions Related to Medications

The Assessment Tool for identifying Hospital Admissions Related to Medications (AT-HARM10) is a screening tool consisting of 10 questions used to determine whether a hospital admission is medication-related. A medication-related admission (MRA) is a hospital admission in which a medication related problem (MRP) is either the main cause for admission or a significantly contributing cause for admission (i.e. without the MRP, the patient would not have been admitted). MRPs are defined here as “undesirable patient experiences that involve medication therapy and that actually or potentially interfere with desired patient outcomes”. These not only involve adverse drug reactions to prescribed medication, but can also involve problems such as inappropriate prescribing and non-compliance, and problems related to over-the-counter (OTC) medications. It does not consider whether the admission was preventable (e.g. an admission caused by side effects of appropriate medication treatment is considered medication-related). AT-HARM10 was developed to measure the incidence of possibly medication-related admissions, MRAs.

The user of AT-HARM10 should not have to go through all patient data in the patient’s medical record, because that would take too much time. The patient data from the medical records that will be provided for the assessment includes: admission notes from the current admission, medication list, laboratory data, pharmacists’ notes and the discharge summary for the admission. All registered medications, including over-the-counter (OTC) medication, should be considered in the assessment. Non-registered complementary and alternative medicine (CAM) products and dietary supplements are not to be considered.

The tool comprises 10 questions which can only be answered "Yes" or "No". For further clarification of each question, please see the examples below. Questions 1-3 are used to identify admissions that are unlikely to be medication-related (U), while questions 4-10 are used to identify possibly medication-related (P) admissions. The assessment is finished as soon as the answer "Yes" is given for any question, resulting in the admission being either U or P. This means that it is not necessary to answer the remaining questions when a “Yes” answer has been given. If all the questions are answered "No", the assessment is still indecisive and needs to be examined by an expert panel.

Please note: While the reason for visiting the emergency department (ED) might be non-medication-related (e.g. chest pain, head ache), in some cases the primary cause for admission might turn out to be medication-related (e.g. low potassium levels discovered while at the ED – worsened by a diuretic). In these cases, the admission should be classified as P.

# AT-HARM10

## Assessment Tool for identifying Hospital Admissions Related to Medications

**Note:** Questions 1-3 are used to identify admissions unlikely to be medication-related, while questions 4-10 are used to identify possibly medication-related admissions. The assessment is finished as soon as the answer "Yes" is given for any question → U (unlikely to be medication-related) or P (possibly medication-related). If all the questions are answered with "No", the admission should be classified as P (possibly medication-related).

1. Was the admission caused by an *infection* or a previously *undiagnosed* disease (e.g. diabetes or heart failure) that is *not medication-related*?

Yes → U (unlikely to be medication-related)

No → NQ (next question)

2. Was the admission caused by progression of a previously diagnosed disease that is *not medication-related* (with the progression of several chronic diseases, such as congestive heart failure or diabetes, a medication-related component can rarely be excluded)?

Yes → U

No → NQ

**NOTE:** Appropriateness of medication treatment should only be considered in relation to this question to determine whether the admission is primarily caused by disease progression (*unlikely MRA*) or suboptimal medication treatment or use (*possible MRA*, question 4-10).

3. Was the admission caused by physical trauma, substance intoxication, social circumstances or allergies (e.g. car accident, wasp allergy, alcohol excess, mushroom poisoning) that are *not medication-related*?

Yes → U

No → NQ

- 
4. Is it hinted or stated in the medical record that the admission was *medication-related* (including non-compliance)?

Yes → P (possibly medication-related)

No → NQ

- 1  
2  
3 5. Might (side) effects of the medications the patient was taking (prescribed or non-prescribed)  
4 prior to hospitalisation have caused the admission (including over-treatment)?

5  
6 Yes → P

7  
8 No → NQ

9 **NOTE:** An admission caused by side effects of appropriate medication treatment should be  
10 classified as *possibly* medication-related.  
11  
12  
13

- 14 6. Are there abnormal laboratory results or vital signs that could be *medication-related* and might  
15 have caused the admission?

16  
17 Yes → P

18  
19 No → NQ  
20  
21

- 22 7. Was there any drug-drug interaction or drug-disease interaction (i.e. a contraindication) that  
23 might have caused the admission?

24  
25 Yes → P

26  
27 No → NQ  
28  
29

- 30 8. Did the patient have any *previously* diagnosed untreated or suboptimally treated (e.g. dose too  
31 low) indications that might have caused the admission?

32  
33 Yes → P

34  
35 No → NQ  
36  
37

- 38 9. Was the patient admitted because of a problem with the dosage form or pharmaceutical  
39 formulation (i.e. failure to receive the medication)?

40  
41 Yes → P

42  
43 No → NQ  
44  
45

- 46 10. Is the cause of the admission a response to cessation or withdrawal of medication therapy?

47  
48 Yes → P

49 No → P (the tool has not been able to rule out that the admission is medication-related)  
50  
51  
52  
53  
54  
55  
56  
57  
58  
59  
60

# AT-HARM10 – Examples

## Assessment Tool for identifying Hospital Admissions Related to Medications

Representative examples of when a question should be answered "Yes" or "No".

1. Was the admission caused by an *infection* or a previously *undiagnosed* disease (e.g. diabetes or heart failure) that is *not medication-related*?

**Yes:** A patient admitted because of pneumonia that was *not related* to the patient's *medications*.

**Yes:** A patient admitted because of rectal bleeding found, after investigation, to have been caused by a tumour.

**Yes:** A patient admitted with an unclear diagnosis and new symptoms. The symptoms cannot be explained by the patient's current medications.

**No:** A patient receiving immunosuppressive treatment admitted with infection.

**No:** A patient admitted with new symptoms indicating heart failure (oedema, shortness of breath) and a history of excessive use of non-steroidal anti-inflammatory drugs (NSAIDs).

2. Was the admission caused by progression of a previously diagnosed disease that is *not medication-related*?

**NOTE:** Appropriateness of medication treatment should only be considered in relation to this question to determine whether the admission is primarily caused by disease progression (*unlikely MRA*) or suboptimal medication treatment or use (*possible MRA*, question 4-10).

**Yes:** A patient admitted because of progression of cancer that is not related to the patient's medications.

**Yes:** A patient admitted because of exacerbation of congestive heart-failure, which worsened despite optimal treatment (the medication therapy seems to follow the applicable treatment guidelines) and with no signs of non-compliance.

**No:** A diabetic patient admitted because of hyperglycaemia without other reason for admission (hyperglycaemia should never lead to admission in a patient that is optimally treated).

3. Was the admission caused by physical trauma, substance intoxication, social circumstances or allergies (e.g. car accident, wasp allergy, alcohol excess, mushroom poisoning) that are *not medication-related*?

**Yes:** A patient admitted because of alcohol intoxication or a car accident that was *not related* to the use of the patient's *medications*.

**No:** A patient admitted because of alcohol intoxication worsened by the concomitant use of sedatives.

- 1  
2  
3  
4  
5  
6  
7  
8  
9
- 
4. Is it hinted or stated in the medical record that the admission is *medication-related* (including non-compliance)?

10  
11  
12  
13  
14  
15  
16  
17  
18  
19  
20  
21  
22  
23  
24  
25  
26  
27  
28  
29  
30  
31  
32  
33  
34  
35  
36  
37  
38  
39  
40  
41  
42  
43  
44  
45  
46  
47  
48  
49  
50  
51  
52  
53  
54  
55  
56  
57  
58  
59  
60

**Yes:** A physician states in the discharge note that the patient was admitted because of constipation caused by the lack of laxative therapy during treatment with a strong opioid.

**Yes:** A patient admitted because of an epileptic seizure and a note in the medical records that the patient is known to be non-compliant.

5. Might (side) effects of the medications the patient was taking (prescribed or non-prescribed) prior to hospitalisation have caused the admission (including over-treatment)?

**NOTE:** An admission caused by side effects of appropriate medication treatment should be classified as *possibly* medication-related.

**Yes:** A patient admitted with gastric bleeding who uses acetylsalicylic acid to prevent thrombotic events (regardless of the presence of a correct indication and the use of a proton pump inhibitor for gastric protection).

**Yes:** A patient admitted because of lactic acidosis after continuing medication with metformin while experiencing dehydrating stomach flu.

**Yes:** A patient who uses antihypertensive medication and was admitted due to a fall caused by orthostatic hypotension.

6. Are there abnormal laboratory results or vital signs that could be *medication-related* and might have caused the admission?

**Yes:** A patient admitted with a serum digoxin concentration of 3.4 nmol/L (toxic concentration) which may have been the cause for admission.

**Yes:** A patient admitted because of hypokalaemia (s-potassium < 3.5 mmol/L) and prescribed a diuretic.

**Yes:** A patient with epilepsy admitted with seizures and prescribed a seemingly adequate dose of carbamazepine but with a measured plasma concentration that is too low.

7. Was there any *drug-drug interaction* or *drug-disease interaction* (i.e. a contraindication) that might have caused the admission?

**Yes:** A patient admitted because of gastrointestinal bleeding who was taking diclofenac and warfarin in combination before admission.

**Yes:** A patient admitted because of serotonin syndrome who was taking tramadol, citalopram and mirtazapine.



1  
2  
3 **Yes:** A patient, previously diagnosed with bilateral renal artery stenosis, admitted because of  
4 acute renal failure after taking an ACE inhibitor.

5  
6 **Yes:** A patient with dementia, who has recently been prescribed an anticholinergic medication  
7 (e.g. hydroxyzine), admitted with confusion.  
8  
9

- 10  
11 8. Did the patient have any, *previously* diagnosed, untreated or suboptimally treated (e.g. dose too  
12 low) indications that might have caused the admission?  
13

14 **Yes:** A patient diagnosed with congestive heart failure, who was taking only a starting dose of  
15 ACE-inhibitor (unjustifiably low dose), admitted because of fluid retention and dyspnoea.

16 **Yes:** A patient admitted because of a hip fracture who had a prior diagnosis of osteoporosis but  
17 was not taking osteoporosis prophylaxis.  
18  
19

- 20  
21  
22 9. Was the patient admitted because of a problem with the dosage form or pharmaceutical  
23 formulation (i.e. failure to receive the medication)?  
24

25 **Yes:** A patient admitted with worsening asthma who was found to be unable to use the inhalers  
26 correctly.  
27

28 **Yes:** A patient admitted with palpitations who was found to be unable to swallow tablets and  
29 had been crushing slow-release antihypertensive tablets that should have been swallowed whole  
30 to retain their slow-release effects.  
31  
32

- 33  
34  
35 10. Is the cause of the admission a response to cessation or withdrawal of medication therapy?  
36

37 **Yes:** A patient whose prednisolone treatment has been discontinued too abruptly admitted with  
38 nausea, vomiting and diarrhoea.  
39  
40  
41  
42  
43  
44  
45  
46  
47  
48  
49  
50  
51  
52  
53  
54  
55  
56  
57  
58  
59  
60

## TRIPOD Checklist: Prediction Model Development and Validation

| Section/Topic                | Item | Checklist Item | Page                                                                                                                                                                                                  |              |
|------------------------------|------|----------------|-------------------------------------------------------------------------------------------------------------------------------------------------------------------------------------------------------|--------------|
| <b>Title and abstract</b>    |      |                |                                                                                                                                                                                                       |              |
| Title                        | 1    | D;V            | Identify the study as developing and/or validating a multivariable prediction model, the target population, and the outcome to be predicted.                                                          | 1            |
| Abstract                     | 2    | D;V            | Provide a summary of objectives, study design, setting, participants, sample size, predictors, outcome, statistical analysis, results, and conclusions.                                               | 1-2          |
| <b>Introduction</b>          |      |                |                                                                                                                                                                                                       |              |
| Background and objectives    | 3a   | D;V            | Explain the medical context (including whether diagnostic or prognostic) and rationale for developing or validating the multivariable prediction model, including references to existing models.      | 3-4          |
|                              | 3b   | D;V            | Specify the objectives, including whether the study describes the development or validation of the model or both.                                                                                     | 4            |
| <b>Methods</b>               |      |                |                                                                                                                                                                                                       |              |
| Source of data               | 4a   | D;V            | Describe the study design or source of data (e.g., randomized trial, cohort, or registry data), separately for the development and validation data sets, if applicable.                               | 5-6, 7-8     |
|                              | 4b   | D;V            | Specify the key study dates, including start of accrual; end of accrual; and, if applicable, end of follow-up.                                                                                        | 5, 7         |
| Participants                 | 5a   | D;V            | Specify key elements of the study setting (e.g., primary care, secondary care, general population) including number and location of centres.                                                          | 5, 7         |
|                              | 5b   | D;V            | Describe eligibility criteria for participants.                                                                                                                                                       | 5, 7         |
|                              | 5c   | D;V            | Give details of treatments received, if relevant.                                                                                                                                                     | -            |
| Outcome                      | 6a   | D;V            | Clearly define the outcome that is predicted by the prediction model, including how and when assessed.                                                                                                | 5            |
|                              | 6b   | D;V            | Report any actions to blind assessment of the outcome to be predicted.                                                                                                                                | 6            |
| Predictors                   | 7a   | D;V            | Clearly define all predictors used in developing or validating the multivariable prediction model, including how and when they were measured.                                                         | 6            |
|                              | 7b   | D;V            | Report any actions to blind assessment of predictors for the outcome and other predictors.                                                                                                            | 6            |
| Sample size                  | 8    | D;V            | Explain how the study size was arrived at.                                                                                                                                                            | Prev study   |
| Missing data                 | 9    | D;V            | Describe how missing data were handled (e.g., complete-case analysis, single imputation, multiple imputation) with details of any imputation method.                                                  | Prev study   |
| Statistical analysis methods | 10a  | D              | Describe how predictors were handled in the analyses.                                                                                                                                                 | 6            |
|                              | 10b  | D              | Specify type of model, all model-building procedures (including any predictor selection), and method for internal validation.                                                                         | 6-7          |
|                              | 10c  | V              | For validation, describe how the predictions were calculated.                                                                                                                                         | 8            |
|                              | 10d  | D;V            | Specify all measures used to assess model performance and, if relevant, to compare multiple models.                                                                                                   | 6-7,8        |
|                              | 10e  | V              | Describe any model updating (e.g., recalibration) arising from the validation, if done.                                                                                                               | -            |
| Risk groups                  | 11   | D;V            | Provide details on how risk groups were created, if done.                                                                                                                                             | 7            |
| Development vs. validation   | 12   | V              | For validation, identify any differences from the development data in setting, eligibility criteria, outcome, and predictors.                                                                         | 7            |
| <b>Results</b>               |      |                |                                                                                                                                                                                                       |              |
| Participants                 | 13a  | D;V            | Describe the flow of participants through the study, including the number of participants with and without the outcome and, if applicable, a summary of the follow-up time. A diagram may be helpful. | 11-12        |
|                              | 13b  | D;V            | Describe the characteristics of the participants (basic demographics, clinical features, available predictors), including the number of participants with missing data for predictors and outcome.    | Prev studies |
|                              | 13c  | V              | For validation, show a comparison with the development data of the distribution of important variables (demographics, predictors and outcome).                                                        | 13           |
| Model development            | 14a  | D              | Specify the number of participants and outcome events in each analysis.                                                                                                                               | 11-12        |
|                              | 14b  | D              | If done, report the unadjusted association between each candidate predictor and outcome.                                                                                                              | -            |
| Model specification          | 15a  | D              | Present the full prediction model to allow predictions for individuals (i.e., all regression coefficients, and model intercept or baseline survival at a given time point).                           | 9            |
|                              | 15b  | D              | Explain how to use the prediction model.                                                                                                                                                              | 10, Fig 1    |
| Model performance            | 16   | D;V            | Report performance measures (with CIs) for the prediction model.                                                                                                                                      | 9, 10, 13    |
| Model-updating               | 17   | V              | If done, report the results from any model updating (i.e., model specification, model performance).                                                                                                   | -            |
| <b>Discussion</b>            |      |                |                                                                                                                                                                                                       |              |
| Limitations                  | 18   | D;V            | Discuss any limitations of the study (such as nonrepresentative sample, few events per predictor, missing data).                                                                                      | 18-19        |
| Interpretation               | 19a  | V              | For validation, discuss the results with reference to performance in the development data, and any other validation data.                                                                             | 14,18        |
|                              | 19b  | D;V            | Give an overall interpretation of the results, considering objectives, limitations, results from similar studies, and other relevant evidence.                                                        | 14-17        |
| Implications                 | 20   | D;V            | Discuss the potential clinical use of the model and implications for future research.                                                                                                                 | 17-18        |
| <b>Other information</b>     |      |                |                                                                                                                                                                                                       |              |
| Supplementary information    | 21   | D;V            | Provide information about the availability of supplementary resources, such as study protocol, Web calculator, and data sets.                                                                         | 20           |
| Funding                      | 22   | D;V            | Give the source of funding and the role of the funders for the present study.                                                                                                                         | 19           |

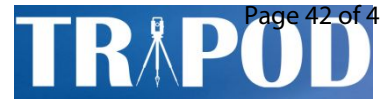

## TRIPOD Checklist: Prediction Model Development and Validation

1  
2 \*Items relevant only to the development of a prediction model are denoted by D, items relating solely to a validation of a prediction model are  
3 denoted by V, and items relating to both are denoted D;V. We recommend using the TRIPOD Checklist in conjunction with the TRIPOD  
4 Explanation and Elaboration document.  
5  
6  
7  
8  
9  
10  
11  
12  
13  
14  
15  
16  
17  
18  
19  
20  
21  
22  
23  
24  
25  
26  
27  
28  
29  
30  
31  
32  
33  
34  
35  
36  
37  
38  
39  
40  
41  
42  
43  
44  
45  
46  
47  
48  
49  
50  
51  
52  
53  
54  
55  
56  
57  
58  
59  
60

For peer review only
